# Collinearity Analysis of Allotetraploid *Gossypium tomentosum* and *Gossypium darwinii*

Fang Liu<sup>1,2</sup>, Zhong L. Zhou<sup>2</sup>, Chun Y. Wang<sup>2</sup>, Yu H. Wang<sup>2</sup>, Xiao Y. Cai<sup>2</sup>, Xing X. Wang<sup>2</sup>, Kun B. Wang<sup>2\*</sup> & Zheng S. Zhang<sup>1\*</sup>

1 College of Agronomy and biotechnology, Southwest University, Chongqing 400715, People's Republic of China

2 State Key Laboratory of Cotton Biology, China / Cotton Research Institute, Chinese Academy of Agricultural Sciences, Anyang 455000, China

Correspondence authors: [wkbcrl@163.com](mailto:wkbcrl@163.com), [zhangzs@swu.edu.cn](mailto:zhangzs@swu.edu.cn)

**Abstract:** *G. tomentosum* and *G. darwinii* are wild allotetraploid cotton species, characterized with many excellent traits including finer fiber fineness, drought tolerance, Fusarium wilt and Verticillium wilt resistance. Based on construction of F<sub>2</sub> linkage groups of *G. hirsutum* × *G. tomentosum* and *G. hirsutum* × *G. darwinii*, two genetic linkage maps were compared. As a result we found a total of 7 inversion fragments on chr02, chr05, chr08, chr12, chr14, chr16 and chr25, 3 translocation fragments on chr05, chr14 and chr26. Further comparing the inversion and translocation fragments, we noticed four of seven markers orientation of *G. tomentosum* consistent with *G. hirsutum* or *G. raimondii*, one of seven inversion markers orientation of *G. darwinii* consistent with *G. hirsutum*; meanwhile one of three translocation marker orientation of *G. tomentosum* consistent with *G. raimondii*. The result indicate, compare *G. darwinii*, *G. tomentosum* has closer genetic relationship to *G. hirsutum*. This study will play an important role in understanding the genome structure of *G. tomentosum* and *G. darwinii*, and open the doors for further in-depth genome research such as fine mapping, tagging genes of interest from wild relatives and evolutionary study.

**Key words:** Cotton germplasm resource, Allotetraploid cotton, *Gossypium tomentosum*, *Gossypium darwinii*, linearity relationship

## Introduction

Cotton is a natural vegetable white fibrous agricultural product of great economic importance as raw material not only for textile industry but also for a wide variety of uses such as paper industry, home fixtures, medical supplies, chemicals and oil (Ensminger et al. 1990). Cotton (*Gossypium* spp) is one of the most expansively grown species around the globe in tropical and subtropical regions between 36° South latitude and 46° North latitude (Reller et al. 1997) of more than 80 countries ( Fryxell 1979; Smith 1995 ). *Gossypium* genus consists of 50 species (Fryxell 1992; Stewart 1995; Ma et al. 2008), which includes five allotetraploid species ( $2n=4x=52$ ; (AD)<sub>1</sub> to (AD)<sub>5</sub>) and 45 diploid species ( $2n=2x=26$ , A through G and K) (Fryxell 1979; Stewart 1995; Brubaker et al. 1999; Zhang et al. 2005). The evolution of domesticated cotton involves various steps that can help scientists to have deep insight understanding of polyploidy role in diversification process and better investigation of unique traits, and it can further help geneticists to utilize germplasm from wild relatives. Allopolyploids provide a great tool to understand the evolutionary process of two diploid genomes which evolve simultaneously but different in genome size. Evolution and diversity studies of *Gossypium* genus provide the basic knowledge of morphological diversity of the genus and plant biology which can help in the better utilization of genetic resources (Wendel et al. 2009).

More than 30 genetic maps have already been published in cotton, and most of them are based on interspecific crosses of domesticated tetraploid species namely *G. hirsutum* and *G. barbadense* (Jiang et al. 1998; Zhang et al. 2002; Lacape et al. 2003; Nguyen et al. 2004; Rong et al. 2004; Guo et al. 2007; He et al. 2007; Lacape et al. 2009). The interspecific tetraploid genetic maps are useful in understanding genome structure and exploring the genetics basis of important agronomic characters and also provide the basis for finding new DNA markers for further high density maps (Guo et al. 2007; Zhang et al. 2008b; Yu et al. 2011).

Wild cotton has long been used as a genetic resource to introduce new traits to increase the potential of cotton cultivated species (Stewart 1995). *G. darwinii*, a wild allotetraploid species with (AD)<sub>5</sub> genome, is closely related to *G. barbadense* but quite different from the cultivated *G. hirsutum*, and it has many excellent traits including finer fiber fineness, drought tolerance, Fusarium wilt and Verticillium wilt resistance. *G. tomentosum* is

endemic to Hawaiian Islands, and it has many unique agronomic traits such as insect-pest resistance, drought tolerance, salt tolerance, heat tolerance, nectarilessness and lint color. Many genetic studies like genomic and genetic structure/organization have been conducted on the two cultivated tetraploids, *G. hirsutum* and *G. barbadense*, however very little is known about genomic architecture, gene transfer or introgression of unique traits from other three tetraploids.

In the present study, the SSR genetic maps are developed from two F<sub>2</sub> populations, (*G. hirsutum* × *G. tomentosum*) (Chen et al. 2015) and (*G. hirsutum* × *G. darwinii*) (Kashif et al. 2015). The linearity relationship is compared between the two genetic maps, which will serve as an indispensable genomic resource for genome structure study, comparative genomic analysis, and fine mapping and map-based gene cloning of important traits.

### Materials and methods

Linkage map were reconstructed reference Chen et, al (2015). and Kashif et, al (2015). SSR markers uniform distribution on different chromosomes were selected and checked after downsizing. JoinMap 4.0 software was used for linkage analysis and map construction. Kosambi mapping function was used to convert recombination frequencies into map distances (centimorgan, cM). Mapchart 2.2 software was used to draw the genetic map.

Linkage map assignment was established by the common markers that were already anchored according to the previous publications (Wang et al. 2012; Li et al. 2014; Li et al. 2015; Zhang et al. 2015). Chromosomal nomenclature was used as mentioned by Guo et al. (2008), i.e. SSR loci anchored on chromosome (Chr.) 1 to 13 were designated to the A sub-genome (At), whereas loci confined to Chr. 14 to 26 were designated to the D sub-genome (Dt).

### Results

Comparing the linear relationship of two genetic linkage maps, we found that most SSR markers present collinearity between the two genetic linkage maps. Meanwhile, part of the non linear relationship appeared on the individual chromosomes between the genetic linkage maps of *G. hirsutum* × *G. tomentosum* and *G. hirsutum* × *G. darwinii*, which include 7 inversion fragments and 3 translocation fragments (Figure 1-13).

Seven inversions were found on seven different chromosomes between the genetic maps

of *G. tomentosum* and *G. darwinii* respectively: on chr02 of MON\_COT043-HAU2643-HAU0248-HAU2923, on chr05 of MON-DPL0384-TMB1586-BNL2448, on chr08 of CGR6748-HAU0709-BNL3257, on chr12 of MON\_CGR5158-NAU943-BNL1673, on chr14 of NAU3691-MON\_CGR5818-TMB1513, on chr16 of CM56-JESPR102-NAU3676-GH56 and on chr25 of MON\_CGR5665-NAU2388-BNL3103. Three translocations were found on 3 different chromosomes between the genetic maps of *G. tomentosum* and *G. darwinii* respectively: on chr05 of NAU2001-NAU1200-NAU3569 fragment parallel translocation with MUSB0592-NAU1127 fragment, on chr26 of MON-CGR5678-MON-DPL0391 fragment parallel translocation with MON-CGR6318- MON-CGR5802 fragment and on chr14 TMB0803-NAU2987 fragment parallel translocation with MON\_C2\_0079-HAU0551 fragment.

Referring to the published *G. Raimondii* genome sequencing data (D<sub>5</sub>, Wang et al. 2012) and the latest *G. hirsutum* genome sequencing data (AD<sub>1</sub>, Zhang et al. 2015), we compared the inversions and translocations on the genetic linkage map with the physical position and arrangement direction on the corresponding genome chromosome. The result showed that, among the inversions, the fragment orientation of *G. darwinii* on chr05 is consistent with the physical direction of *G. Raimondii* (D<sub>5</sub>) and *G. hirsutum* (AD<sub>1</sub>) genome sequence. The fragments orientation of *G. tomentosum* on chr08, chr12 and chr25 are consistent with the physical directions of *G. Raimondii* (D<sub>5</sub>). The fragments orientation of *G. tomentosum* on chr08, chr12 and chr16 are consistent with the physical directions of *G. hirsutum* (AD<sub>1</sub>). Among the translocation, just the fragment on chr26 corresponding physical position was found on *G. Raimondii* (D<sub>5</sub>), with the same direction as *G. tomentosum*.

## Discussion

### Reciprocal translocations and Inversion

In the study of *Gossypium* genetic linkage map construction, Researchers have repeatedly found in the reciprocal translocation between homologous chromosomes (Rong et al. 2004; He et al. 2007; Wang et al. 2006; John et al. 2012). Very few study focus on different cotton linear relationship between homologous chromosomes. In this study, use the same variety of *G. hirsutum*, we constructed allotetraploid genetic linkage maps of *G. hirsutum* × *G.*

*tomentosum* and *G. hirsutum* × *G. darwinii*. Through linear relationship analysis on homologous position, there are seven inversions (corresponding on chr02, chr05, chr08, chr12, chr14, chr16 and chr25) and three translocations (corresponding on chr05, chr14 and chr26) were found separately on the two genetic linkage maps. Compare the inversions and translocations location with the physical position of *G. hirsutum*, we found the same inversion phenomena appeared on the corresponding position of chr02, chr05, chr12 and chr14 in *G. hirsutum*, the same with translocation on the corresponding position of chr05 in *G. hirsutum*. For the first time we discovered inversion on the homologous chromosome fragments of chr02 and chr14, and for the first time we found out the translocations on chr05 and chr14. In this study we also found inversion and translocation appeared at the same fragment, which indicate it is genetic active region. Further research need to confirm inversion occur before or after translocation.

### **Genetic mapping coupled with physical alignment of genomic**

A lot of research has been done on the origin and evolution of allotetraploid cotton by previous researchers. Fryxell (1992) and Wendel (2009) support the idea that *G. tomentosum* and *G. hirsutum* has a closer relationship, however *G. darwinii* and *G. barbadense* has a closer relationship. Rarely research has done to the linear relationship of chromosome genetic linkage between *G. tomentosum* and *G. darwinii*. With the cotton genome sequencing successively completed, relationship between genetic linkage map and physical map study became feasible and convenient. Using F<sub>2</sub> population derived from interspecific crosses, we constructed two linkage maps of allotetraploid cotton *G. hirsutum* × *G. tomentosum* and *G. hirsutum* × *G. darwinii* separately. Referring to the latest published *G. hirsutum* genome sequencing data (Zhang et al. 2015), linear relationship of the two wild allotetraploid cotton genetic linkage maps was compared based on genome-wide SSR markers. The results show that the genetic linkage maps of *G. hirsutum* × *G. tomentosum* and *G. hirsutum* × *G. darwinii* had good linear relationship. Meanwhile, part of the non linear relationship appeared on the individual chromosomes between the two genetic linkage maps, including 7 inversion fragments and 3 translocation fragments. Compared with the sequence data of *G. hirsutum* (Zhang et al. 2015), we noticed among the 7 inversion fragments, just one markers orientation (chr05) which comes from *G. darwinii* has the same direction of physical position arrangement of

*G. hirsutum*, while four markers orientation (chr08, chr12, chr16 and chr25) which comes from *G. tomentosum* has the same direction of physical position arrangement of *G. hirsutum* or *G. raimondii*. Among the 3 translocation fragments, one marker orientation (chr26) which comes from *G. tomentosum* has the same direction of physical position arrangement of *G. raimondii*. The result indicate compare *G. darwinii*, *G. tomentosum* has closer genetic relationship to *G. hirsutum*.

**Acknowledgements** This work was co-supported by the National Science and Technology Support Plan of China (2013AA102601) and National Key Technology Support Program of China (2013BAD01B03).

### Competing interests

The authors declare that they have no competing interests.

### Authors' contributions

Kunbo Wang, Zhengsheng Zhang and Fang Liu participated in the experiments design. Fang Liu carried out most of the experiments and all computational analyses. Zhong-Li Zhou, Chun-Ying Wang and Yu-Hong Wang participated in part of groups construction, Xiao-Yan Cai, Xing-Xing Wang participated in part of mapping experiments. Fang Liu drafted the manuscript. Baohong Zhang, Kunbo Wang and Zhengsheng Zhang revised the manuscript. All authors read and approved the final manuscript.

### References

1. Ensminger, M. E., J. E. Oldfield, W. W. Heinemann, 1990 Excerpts with reference to cottonseed components. In: Ensminger Publishing Company, USA.
2. Reller, A., J. Gerstenberg, 1997 White gold, where do you go? Status quo and prospects of cotton usage. GAIA. 1, 35 - 51.
3. Fryxell, P. A., 1979 The natural history of the cotton tribe. Texas A&M University.
4. Smith, C. W., 1995 Cotton (*Gossypium hirsutum* L.). Chapter 6. In: Crop Production: Evolution, History, and Technology. John Wiley and Sons, Inc., New York, 287-349.
5. Fryxell, P. A., 1992 A revised taxonomic interpretation of *Gossypium* L. Malvaceae. Rheedea, 2, 108-165.
6. Stewart, J. M., 1995 Potential for crop improvement with exotic germplasm and genetic engineering.

In: G. Constable and N. Forrester (eds.). Challenging the future. Proceedings of the World Cotton Research Conference-1. CSIRO, Melbourne, 313-327.

7. Ma, X., B. L. Zhou, Y. Lu, W. Z. Guo, T. Z. Zhang, 2008 Simple sequence repeat genetic linkage maps of A-genome diploid cotton (*Gossypium arboreum*). Journal of Integrative Plant Biology, 50, 491-502.

8. Brubaker, C. L., F. M. Bourland, J. F. Wendel, 1999 The origin and domestication of cotton. In W. Smith and T. Cothren (eds.) Cotton: Origin, history, technology and production. John Wiley & Sons, Inc, 3-31.

9. Zhang, J. F., Y. Z. Lu, S. X. Yu, 2005 Cleaved AFLP (cAFLP), a modified amplified fragment length polymorphism analysis for cotton. Theoretical and Applied Genetics. 111, 1385-1395.

10. Wendel, J. F., C. Brubaker, I. Alvarez, R. Cronn, J. M. Stewart, 2009 Plant Genetics and Genomics: Crops and Models, Genetics and Genomics of Cotton: Evolution and Natural History of the Cotton Genus. Springer Science Business Media, LLC, 3, 3-22.

11. Jiang, C. X., R. J. Wright, K. M. El-Zik, A. H. Paterson, 1998 Polyploid formation created unique avenues for response to selection in *Gossypium* (cotton). Proc. Natl. Acad. Sci., 95, 4419-4424.

12. Zhang, J., W. Z. Guo, T. Z. Zhang, 2002 Molecular linkage map of allotetraploid cotton (*Gossypium hirsutum* L. x *Gossypium barbadense* L.) with a haploid population. Theor. Appl. Genet. 105:1166-1174.

13. Lacape, J. M., T. B. Nguyen, S. Thibivilliers, B. Bojinov, B. Courtois, R. G. Cantrell, B. Burr, B. Hau, 2003 A combined RFLP-SSR-AFLP map of tetraploid cotton based on a *Gossypium hirsutum* x *Gossypium barbadense* backcross population. Genome. 46, 612-626.

14. Nguyen, T. B., M. Giband, P. Brottier, A. M. Risterucci, J. M. Lacape, 2004 Wide coverage of the tetraploid cotton genome using newly developed microsatellite markers. Theor Appl Genet. 109: 167-175.

15. Rong, J. K., C. Abbey, J. E. Bowers, C. L. Brubaker, C. Chang, P. W. Chee, T. A. Delmonte, X. Ding, J. J. Garza, B. S. Marler, C. Park, G. J. Pierce, K. M. Rainey, V. Rastogi, K. Schulze, N. L. Tronlinde, J. F. Wendel, T. A. Wilkins, R. A. Wing, R. J. Wright, X. Zhao, L. Zhu, A. H. Paterson, 2004 A 3347-locus genetic recombination map of sequence-tagged sites reveals features of genome organization, transmission and evolution of cotton (*Gossypium*). Genetics. 166. 389-417.

16. Guo, W. Z., C. P. Cai, C. B. Wang, Z. G. Han, X. L. Song, K. Wang, X. Niu, C. Wang, K. Lu, B. Shi, T. Z. Zhang, 2007 A microsatellite-based, gene-rich linkage map reveals genome structure, function and evolution in *Gossypium*. Genetics. 176:527-541.

17. He, D. H., Z. X. Lin, X. L. Zhang, Y. C. Nie, X. P. Guo, Y. X. Zhang, W. Li, 2007 QTL mapping for economic traits based on a dense genetic map of cotton with PCR-based markers using the interspecific cross of *Gossypium hirsutum* x *Gossypium barbadense*. Euphytica. 153, 181-197.

18. Lacape, J. M., J. Jacobs, T. Arioli, R. Derijcker, N. Forestier-Chiron, D. Llewellyn, J. Jean, E.



- Thomas, C. Viot, 2009 A new interspecific, *Gossypium hirsutum* x *G. barbadense*, RIL population: towards a unified consensus linkage map of tetraploid cotton. Theor. Appl. Genet. 119: 281 - 292.
19. Zhang, Y. X., Z. X. Lin, Q. Z. Xia, M. G. Zhang, X. L. Zhang, 2008b Characteristics and analysis of simple sequence repeats in the cotton genome based on a linkage map constructed from a BC<sub>1</sub> population between *Gossypium hirsutum* and *G. barbadense*. Genome. 51, 534-546.
20. Yu, Y. D. J. Yuan, S. G. Liang, X. M. Li, X. Q. Wang, Z. X. Lin, X. L. Zhang, 2011 Genome structure of cotton revealed by a genome-wide SSR genetic map constructed from a BC<sub>1</sub> population between *Gossypium hirsutum* and *G. barbadense*. BMC Genomics. 12, 15.
21. Stewart, J. M., 1995 Potential for crop improvement with exotic germplasm and genetic engineering. In: G. Constable, Forrester N W. Challenging the future. Proceedings of the World Cotton Research Conference-1 Melbourne, Australia, CSIRO. 313-327.
22. Chen, H. D., R. K. Kashif, Z. L. Zhou, I. Kashif, X. X. Wang, X. Y. Cai, Wang, C. Y. Wang, Y. H. Wang, Y. Q. Li, F. Liu, K. B. Wang, 2015 A High-density SSR genetic map constructed from a F<sub>2</sub> population of *Gossypium hirsutum* and *Gossypium darwinii*. Gene: <http://dx.doi.org/10.1016/j.gene.2015.08.022>
23. Kashif, R. K., H. D. Chen, Z. L. Zhou, X. X. Wang, X. Y. Cai, Wang, C. Y. Wang, Y. H. Wang, Y. Q. Li, F. Liu, K. B. Wang, 2015 Genome wide SSR high density genetic map construction from an interspecific cross of *G. hirsutum* × *G. tomentosum*. Genetic Molecular Research. accepted.
24. Wang, K. B., Z. W. Wang, F. G. Li, W. W. Ye, J. Y. Wang, G. L. Song, Z. Yue, L. Cong, H. H. Shang, S. L. Zhu, C. S. Zou, Q. Li, Y. L. Yuan, C. R. Lu, H. L. Wei, C. Y. Gou, Z. Q. Zheng, Y. Yin, X. Y. Zhang, K. Liu, B. Wang, C. Song, N. Shi, J. K. Russell, G. P. Richard, Z. Y. John, Y. X. Zhu, J. Wang, & S. X. Yu, 2012 The draft genome of a diploid cotton *Gossypium raimondii*. Nature Genetics. 44, 1098-1103; doi: 10.1038/ng. 2371.
25. Li, F. G., K. B. Wang, Y. L. Yuan, G. L. Song, C. S. Zou, H. H. Shang, W. W. Ye, X. Y. Zhang, H. L. Wei, Z. F. Li, & S. X. Yu, 2014 Genome sequence of the cultivated cotton *Gossypium arboreum*. Nature Genetics. doi: 10.1038/ng.2987.
26. Li, F. G., G. Y. Fan, C. R. Lu, G. H. Xiao, C. S. Zou, J. K. Russell, Z. Y. Ma, H. H. Shang, X. F. Ma, J. Y. Wu, X. M. Liang, G. Huang, G. P. Richard, K. Liu, W. H. Yang, W. B. Chen, X. M. Du, C. C. Shi, Y. L. Yuan, W. W. Ye, X. Liu, X. Y. Zhang, W. Q. Liu, H. L. Wei, S. J. Wei, G. D. Huang, X. L. Zhang, S. J. Zhu, H. Zhang, F. M. Sun, X. F. Wang, J. Liang, J. H. Wang, Q. He, L. H. Huang, J. Wang, J. J. Cui, G. L. Song, K. B. Wang, X. Xu, Z. Y. John Y. X. Zhu, & S. X. Yu, 2015 Genome sequence of cultivated Upland cotton (*Gossypium hirsutum* TM-1) provides insights into genome evolution. Nature biotechnology. doi: 10.1038/nbt.3208.
27. Zhang, T. Z., Y. Hu, W. K. Jiang, L. Fang, X. Y. Guan, J. D. Chen, J. B. Zhang, A. S. Christopher, E. S. Brian, M. S. David, M. H. Amanda, Q. Wan, B. L. Liu, C. X. Liu, S. Wang, M. Q. Pan, Y. K. Wang, D. W. Wang, W. X. Ye, L. J. Chang, W. P. Zhang, Q. X. Song, C. K. Ryan, X. Y. Chen, D.



Elizabeth, J. L. Danny, G. P. Daniel, T. Peggy, C. J. Don, Q. Wang, X. Y. Xu, H. Zhang, H. T. Wu, L. Zhou, G. F. Mei, S. Q. Chen, Y. Tian, D. Xiang, X. H. Li, J. Ding, Q. Y. Zuo, L. Tao, Y. C. Liu, J. Li, Y. Lin, Y. Y. Hui, Z. S. Cao, C. P. Cai, X. F. Zhu, Z. Jiang, B. L. Zhou, W. Z. Guo, R. Q. Li, & Z. J. Chen, 2015 Sequencing of allotetraploid cotton (*Gossypium hirsutum* L. acc. TM-1) provides a resource for fiber improvement. *Nature biotechnology*. doi:10.1038/nbt.3208.

28. Guo, W. Z., C. P. Cai, C. B. Wang, L. Zhao, L. Wang, T. Z. Zhang, 2008 A preliminary analysis of genome structure and composition in *Gossypium hirsutum*. *BMC Genomics*. **9**, 314.

29. Wang, K., X. L. Song, Z. G. Han, W. Z. Guo, J. Z. Yu, et al. 2006 Complete assignment of the chromosomes of *Gossypium hirsutum* L. by translocation and fluorescence in situ hybridization mapping. *Theor. Appl. Genet*, 113, 73–80.

30. John, Z. Y., J. K. Russell, D. F. David, C. Jaemin, V. D. Allen, U. Mauricio, M. H. Steven, E. P. Alan, M. S. David, N. J. Johnie, S. Sukumar, P. K. Siva, R. S. Manali, V. H. William, & G. P. Richard, 2012 A High-Density Simple Sequence Repeat and Single Nucleotide Polymorphism Genetic Map of the Tetraploid Cotton Genome. *Genes Genomes Genetics*. doi: 10.1534/g3.111.001552.

Figure 1 to 13: genetic map and Collinearity comparing of *G. Tomentosum* and *G. Darwinii*.

Gd: *Gossypium Darwinii*

GT: *Gossypium Tomentosum*

| Linkage group | Markers                                                         | Location on <i>G. darwinii</i> (genetic position, cM) | Location on <i>G. tomentosum</i> (genetic position) | Corresponding location on <i>G. raimondii</i> (physical position, Mb) | Corresponding location on <i>G. hirsutum</i> (physical position, Mb) | Events                    |
|---------------|-----------------------------------------------------------------|-------------------------------------------------------|-----------------------------------------------------|-----------------------------------------------------------------------|----------------------------------------------------------------------|---------------------------|
| chr02         | MON_COT043-HAU2643-HAU0248-HAU2923                              | 77.7-78.8-78.9-79.4                                   | 92.5-91.3-89.7-87.8                                 |                                                                       |                                                                      | inversion                 |
| chr05         | MON_DPL0384-TMB1586-BNL2448                                     | 144.1-146.1-147.8                                     | 86.3-84-82.6                                        | 21.4-21.6                                                             | 37.2-58.2                                                            | inversion                 |
| chr08         | MON_CGR6748-HAU1632-BNL3257                                     | 66.4-70.3-71.7                                        | 71.1-68.1-64.7                                      | 6.5-31.3-46.1                                                         | 85.6-58.9                                                            | inversion                 |
| chr12         | MON_CGR5158-NAU943-BNL1673                                      | 107.3-108-111                                         | 111.2-109.2-107.1                                   | 44.2-42.6                                                             | 93.5-41.7                                                            | inversion                 |
| chr16         | CM56-JESPR102-NAU3676-GH56                                      | 34-34.7-36.6-39                                       | 70.6-69.4-63.4-58.4                                 |                                                                       | 47.1-39.5                                                            | inversion                 |
| chr25         | MON_CGR5665-NAU2388-BNL3103                                     | 18.6-20.9-23.3                                        | 29.8-29.4-28.6                                      | 42.9-40.6                                                             |                                                                      | inversion                 |
| chr05         | NAU2001-NAU1200-NAU3569-MUSB0592-NAU1127                        | 195.1-199.5-202.9-205.7-207                           | 132.7-133.4-133.7-129-132.5                         |                                                                       |                                                                      | translocation             |
| chr26         | MON_CGR5678-MON_DPL0391-MON_CGR6318-MON_CGR5802                 | 34.9-35.3-37.4-38.2                                   | 31.5-33-29.6-30                                     | 17.1-31.1-10.2-10.8                                                   |                                                                      | translocation             |
| chr14         | TMB0803-NAU2987-MON_C2_0079-HAU0551-NAU3691-MON_CGR5818-TMB1513 | 51.9-52.1-53.9-54.8-55-55.3-56.6                      | 68-69.5-65.9-66.2-64.5-62.3-60.4                    |                                                                       |                                                                      | inversion & translocation |

Table 1 Location comparing of genetic linkage fraction and genome physical position

chr01Gd(A1)

chr01Gt(A1)

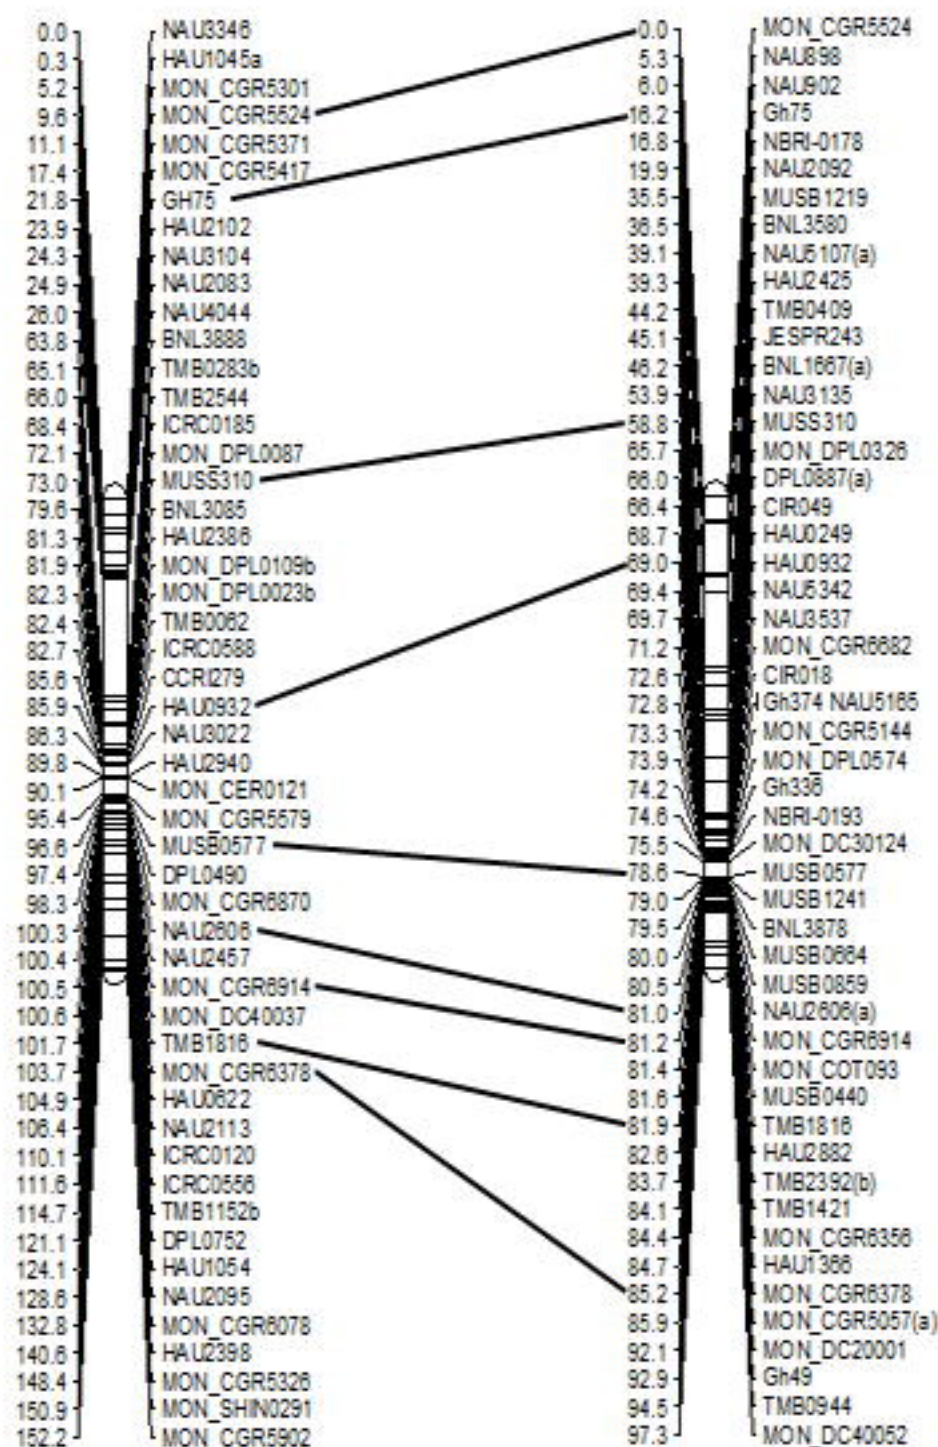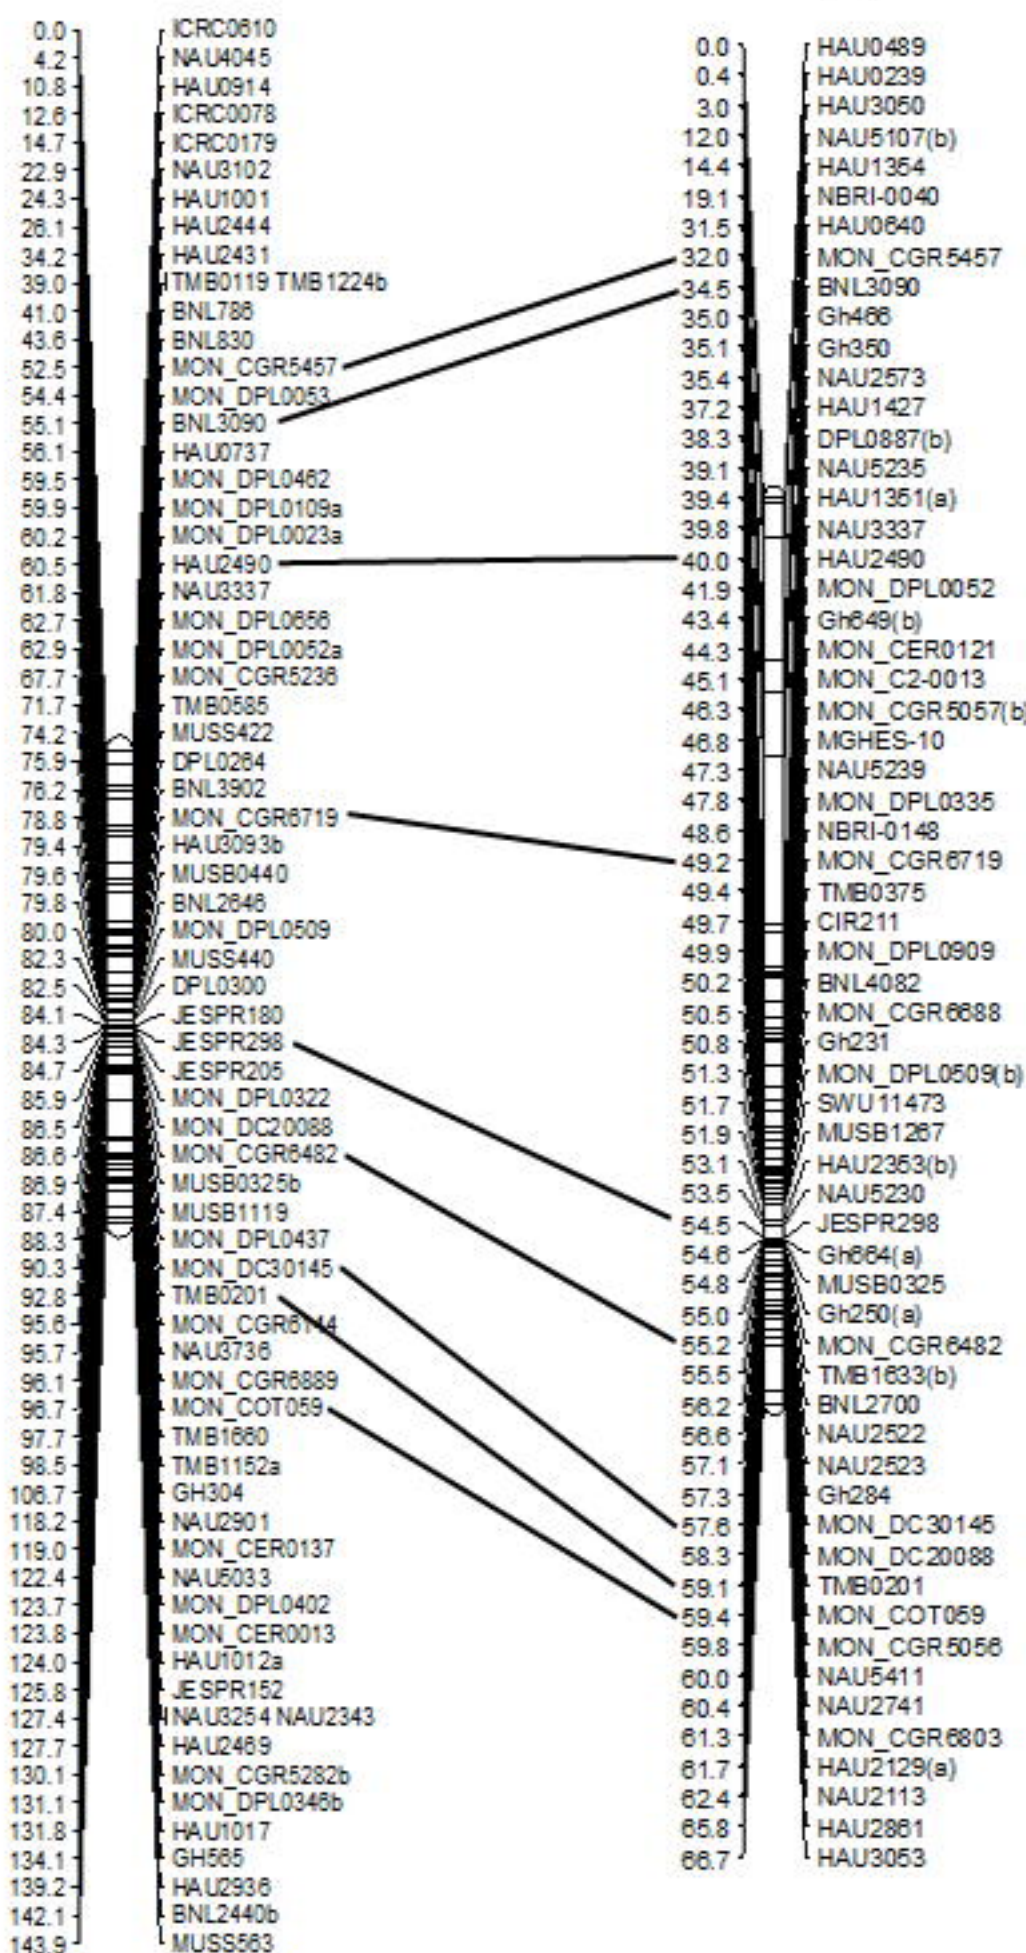



chr02Gd(A2)

chr02Gt(A2)

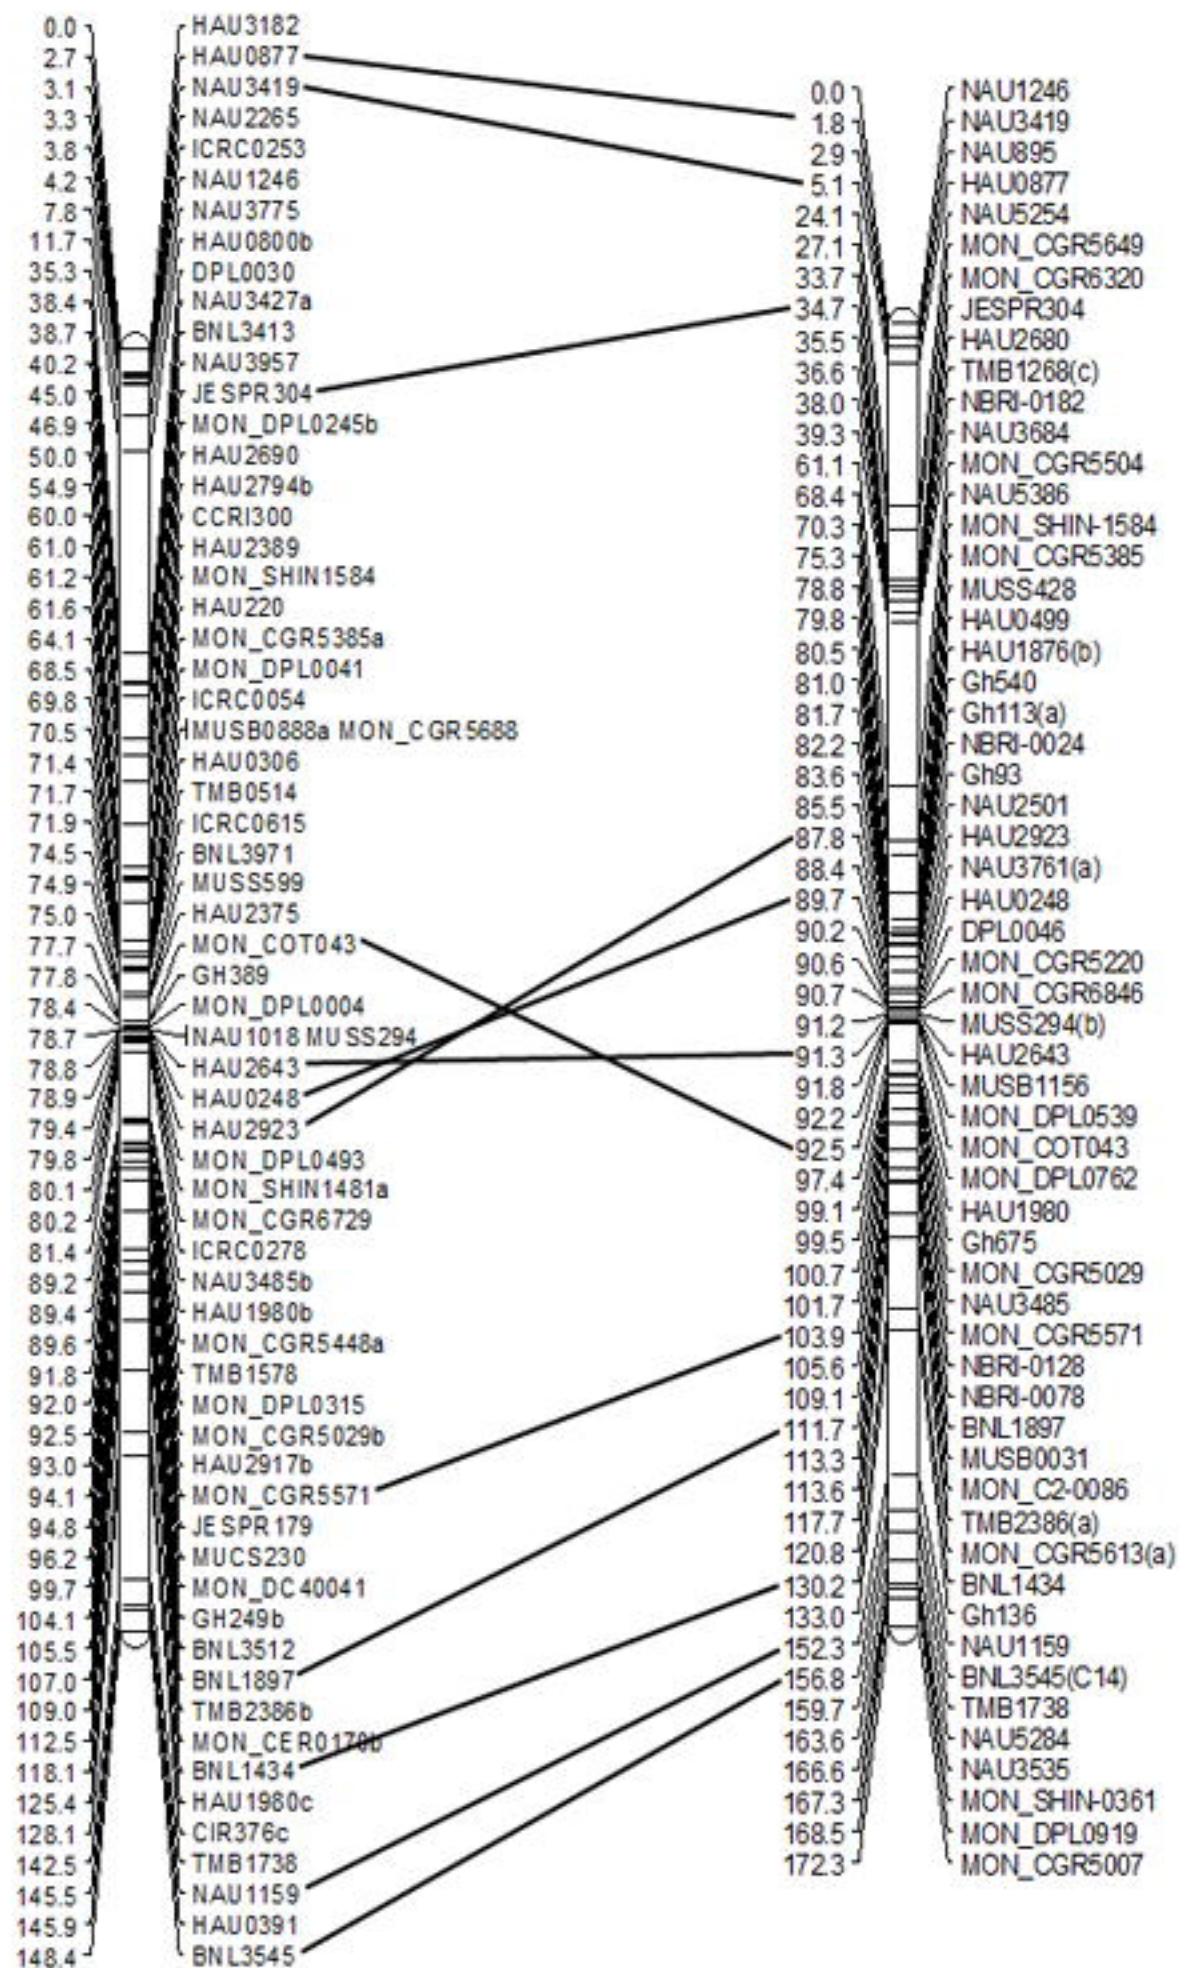

chr14Gd(D2)

chr14Gt(D2)

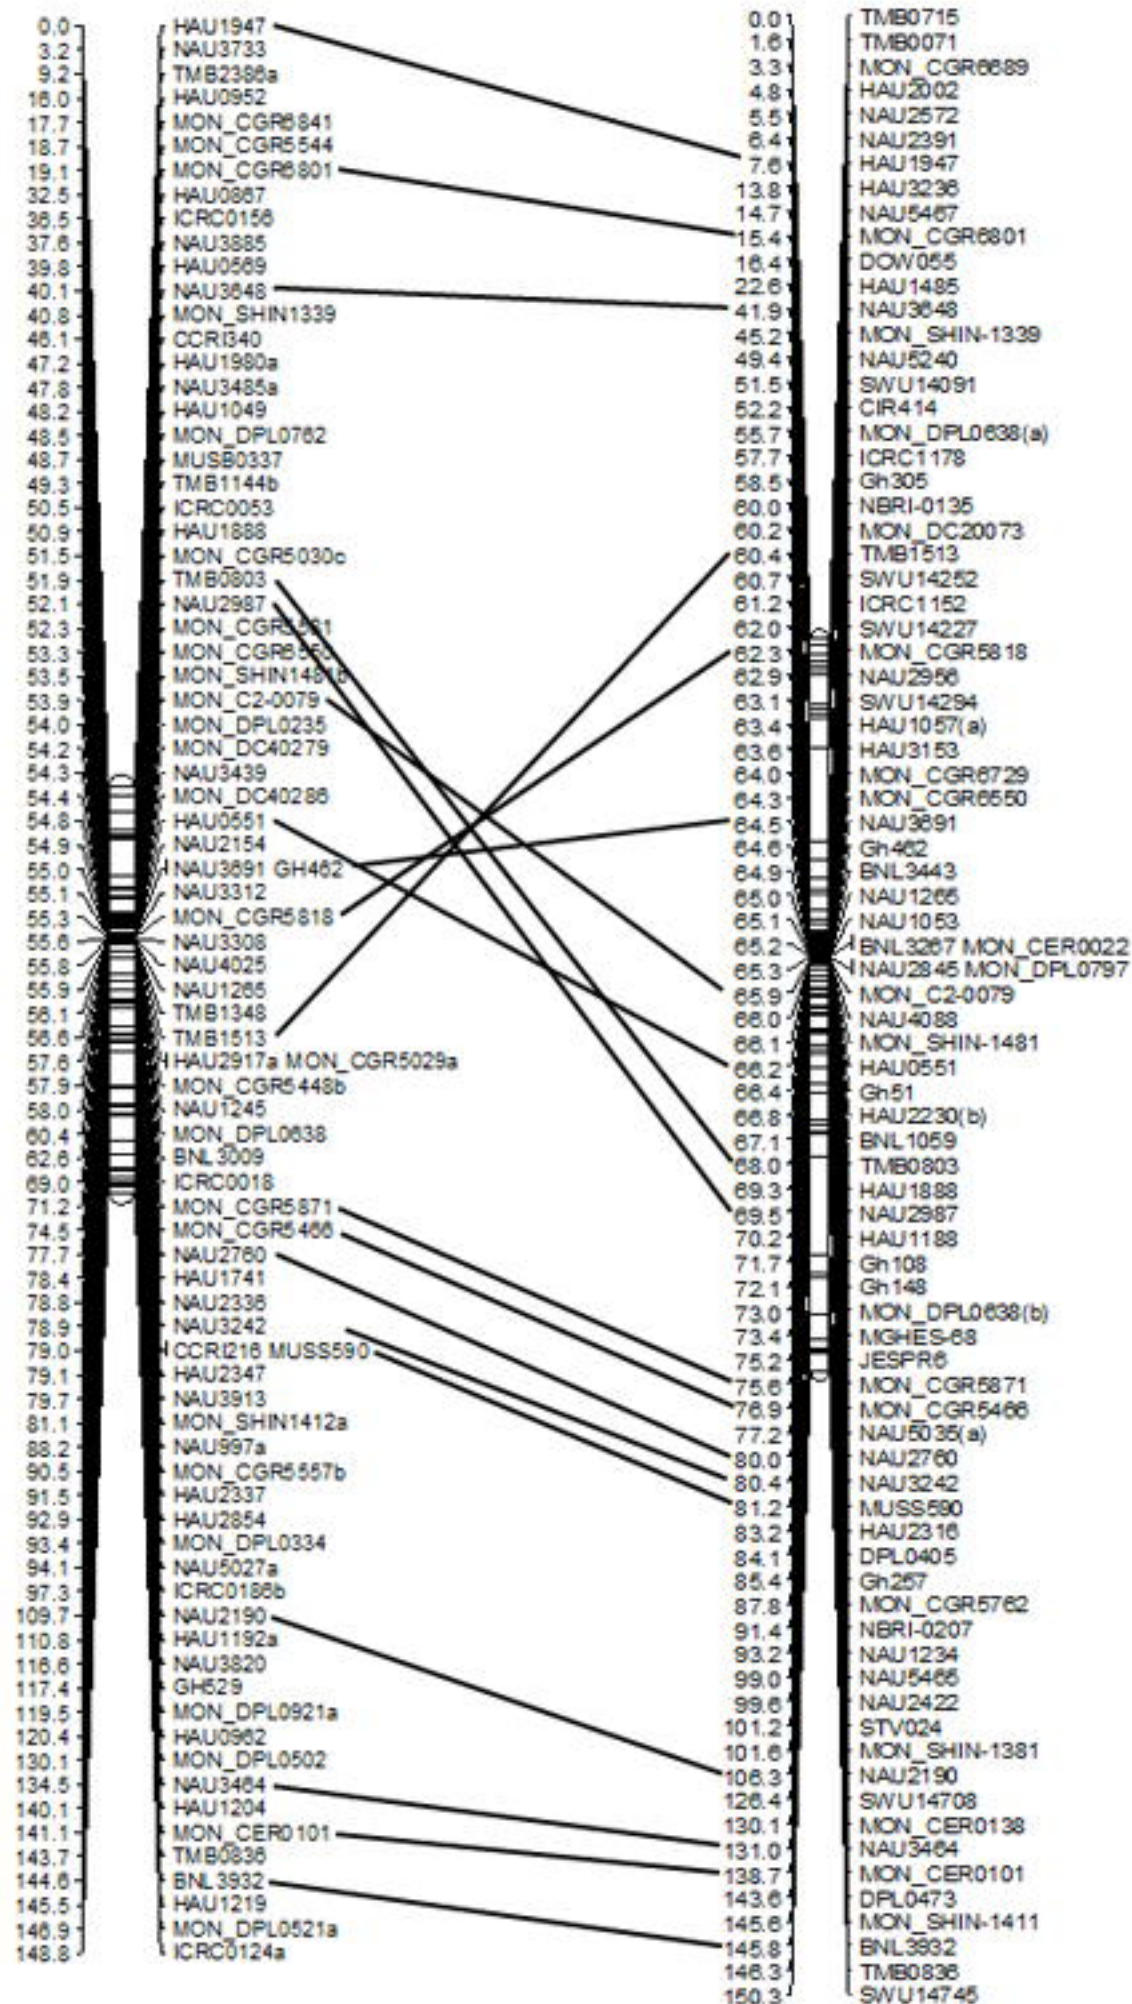



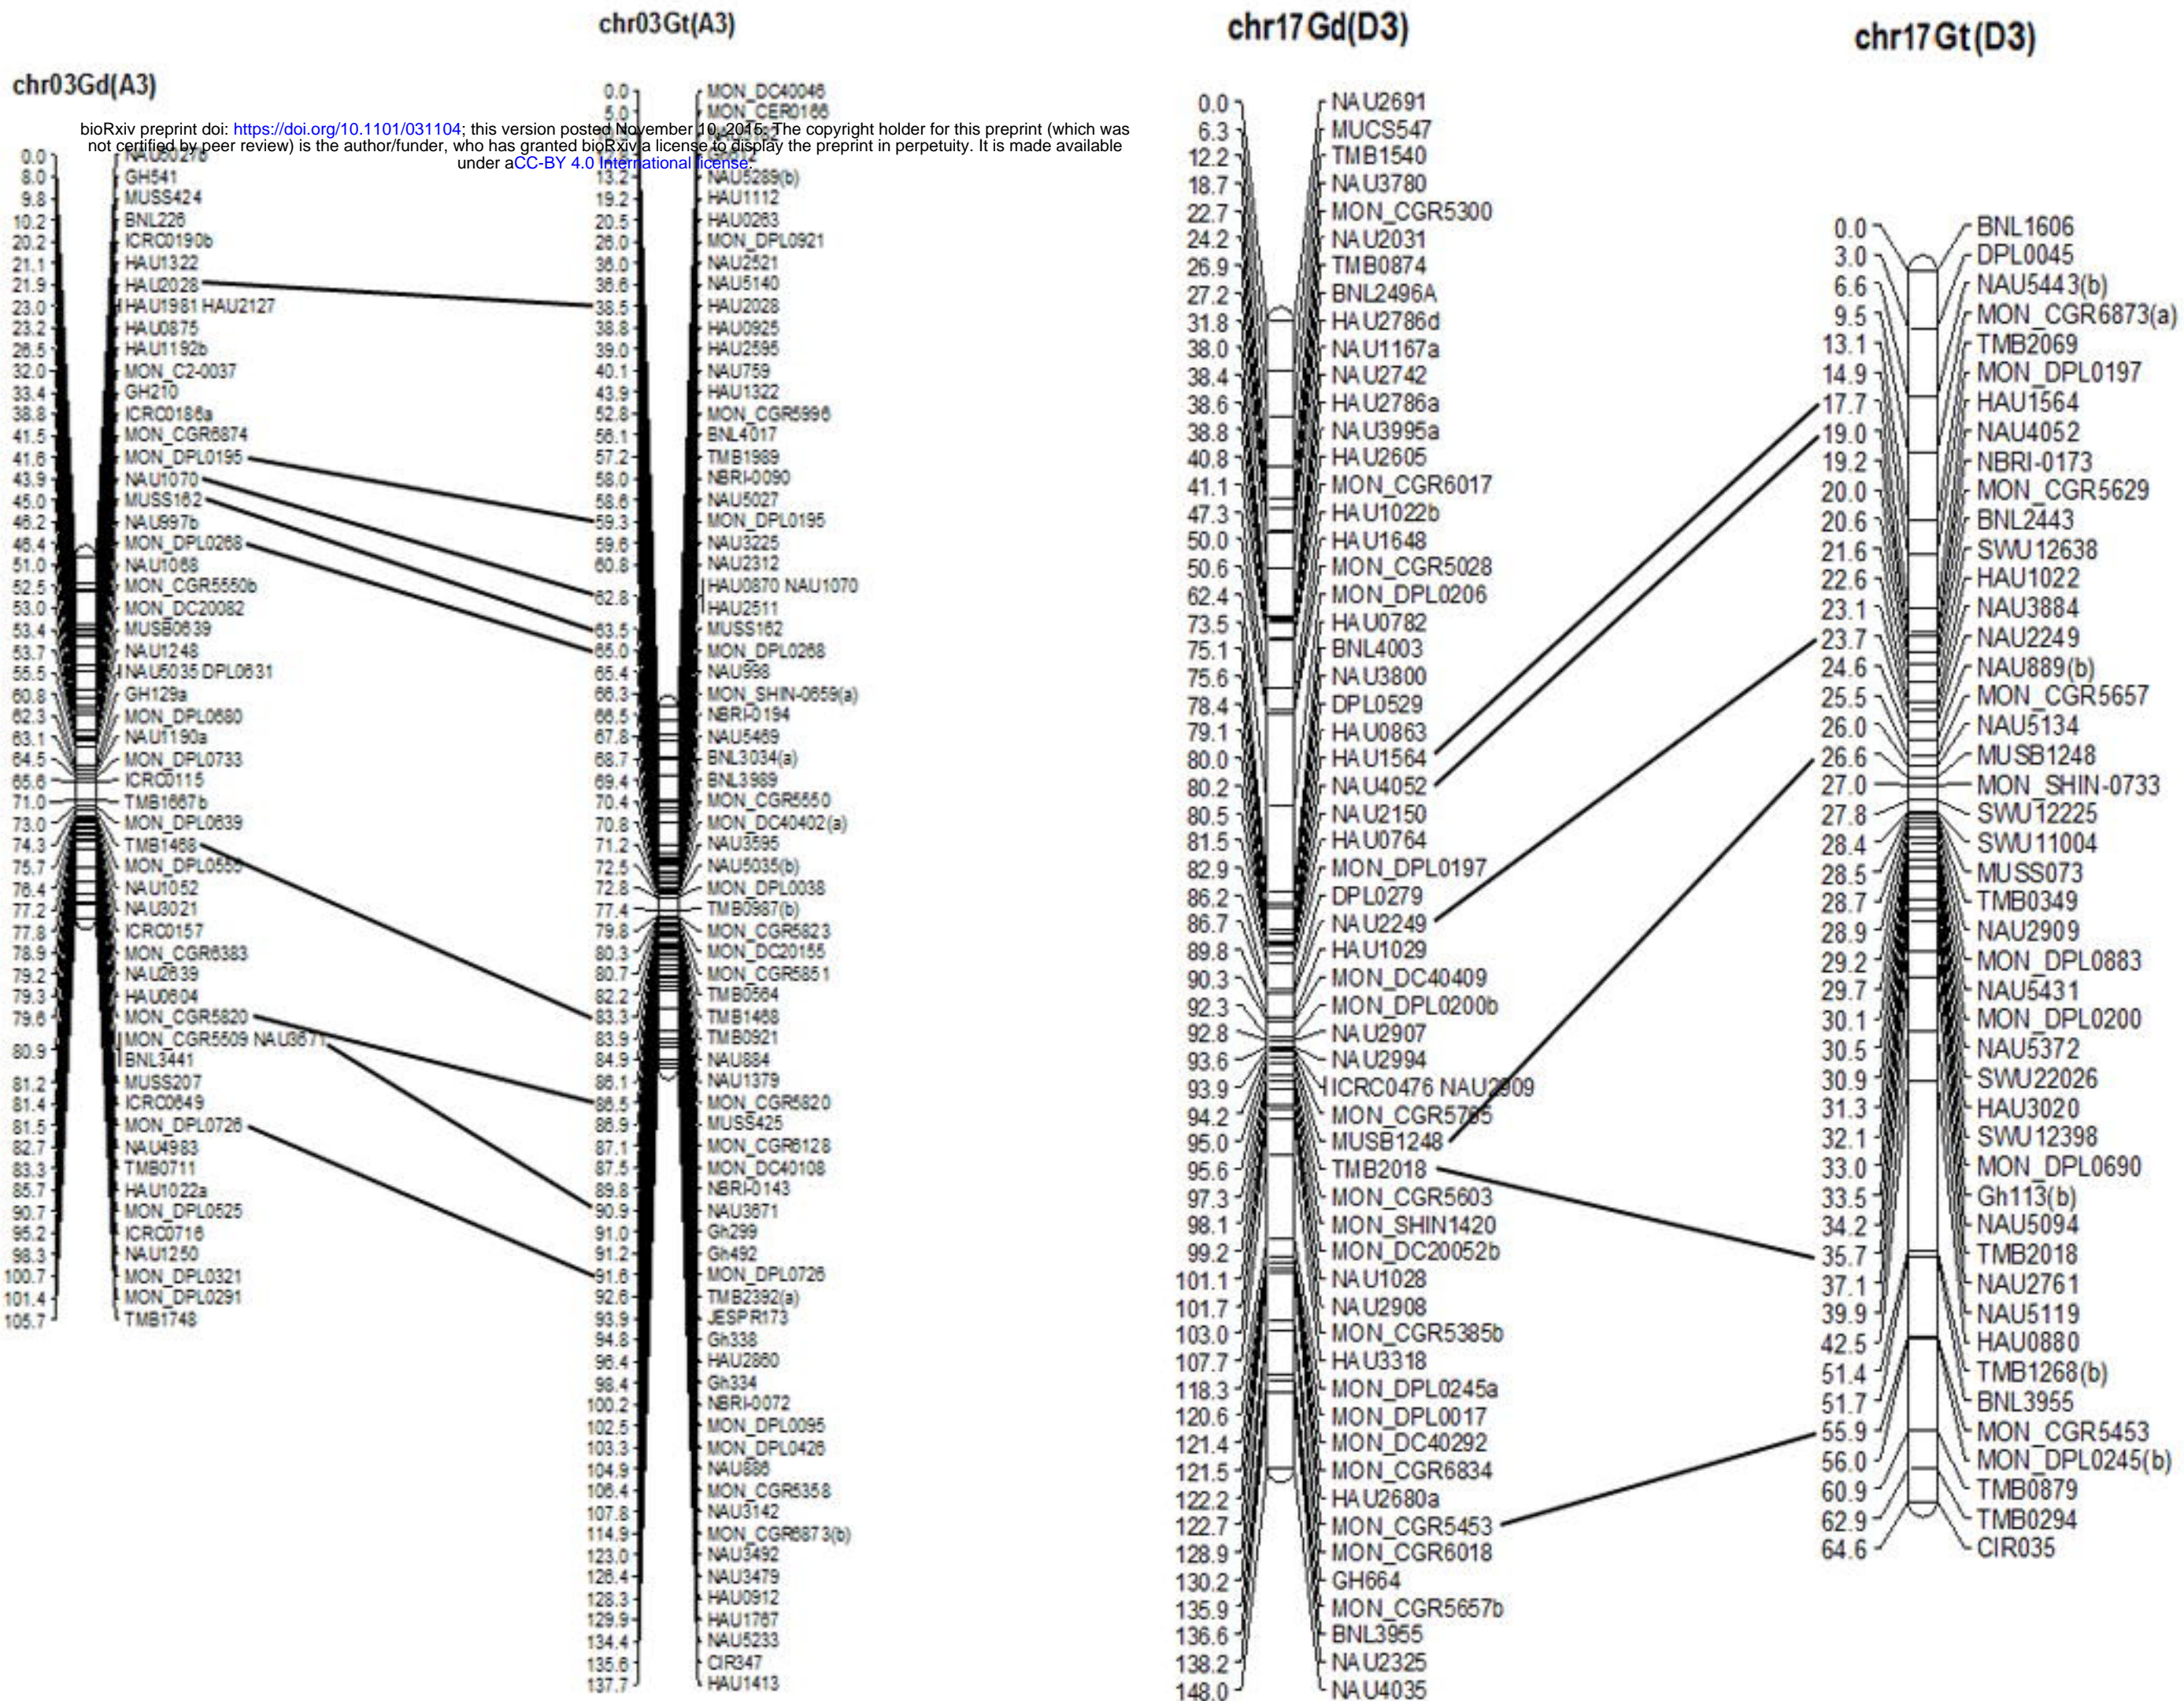



chr04Gt(A4)

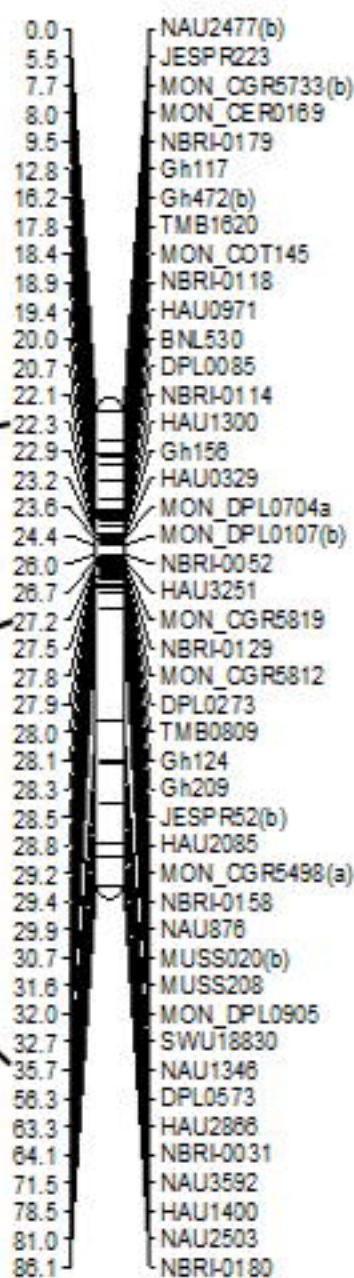

chr22Gd(D4)

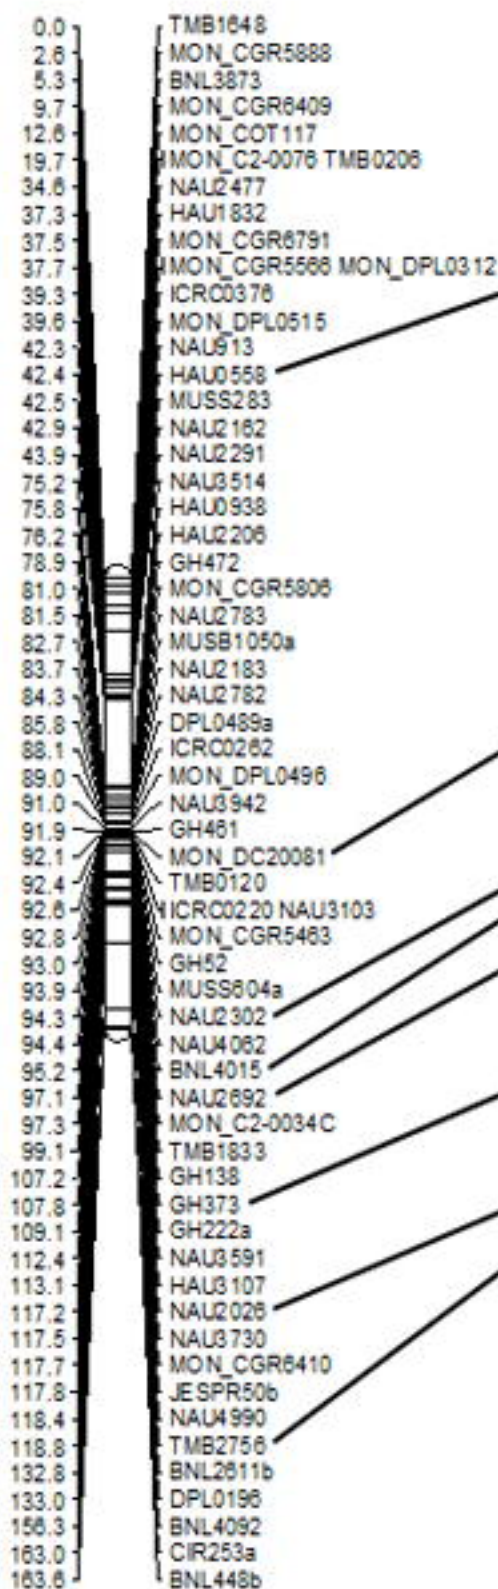

chr22Gt(D4)

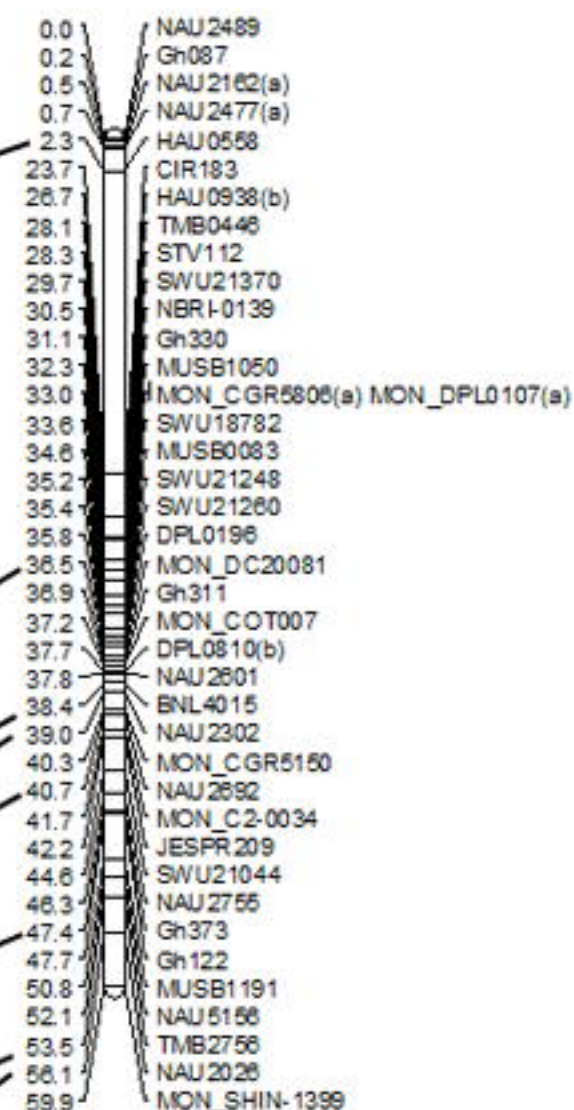

chr04Gd(A4)

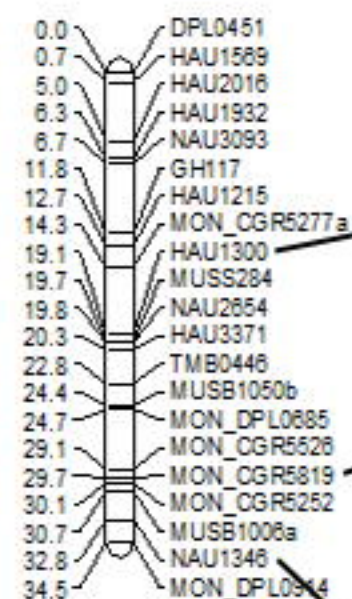



## chr05Gd(A5)

## ch05Gt(A5)

## chr19Gd(D5)

## chr19Gt(D5)

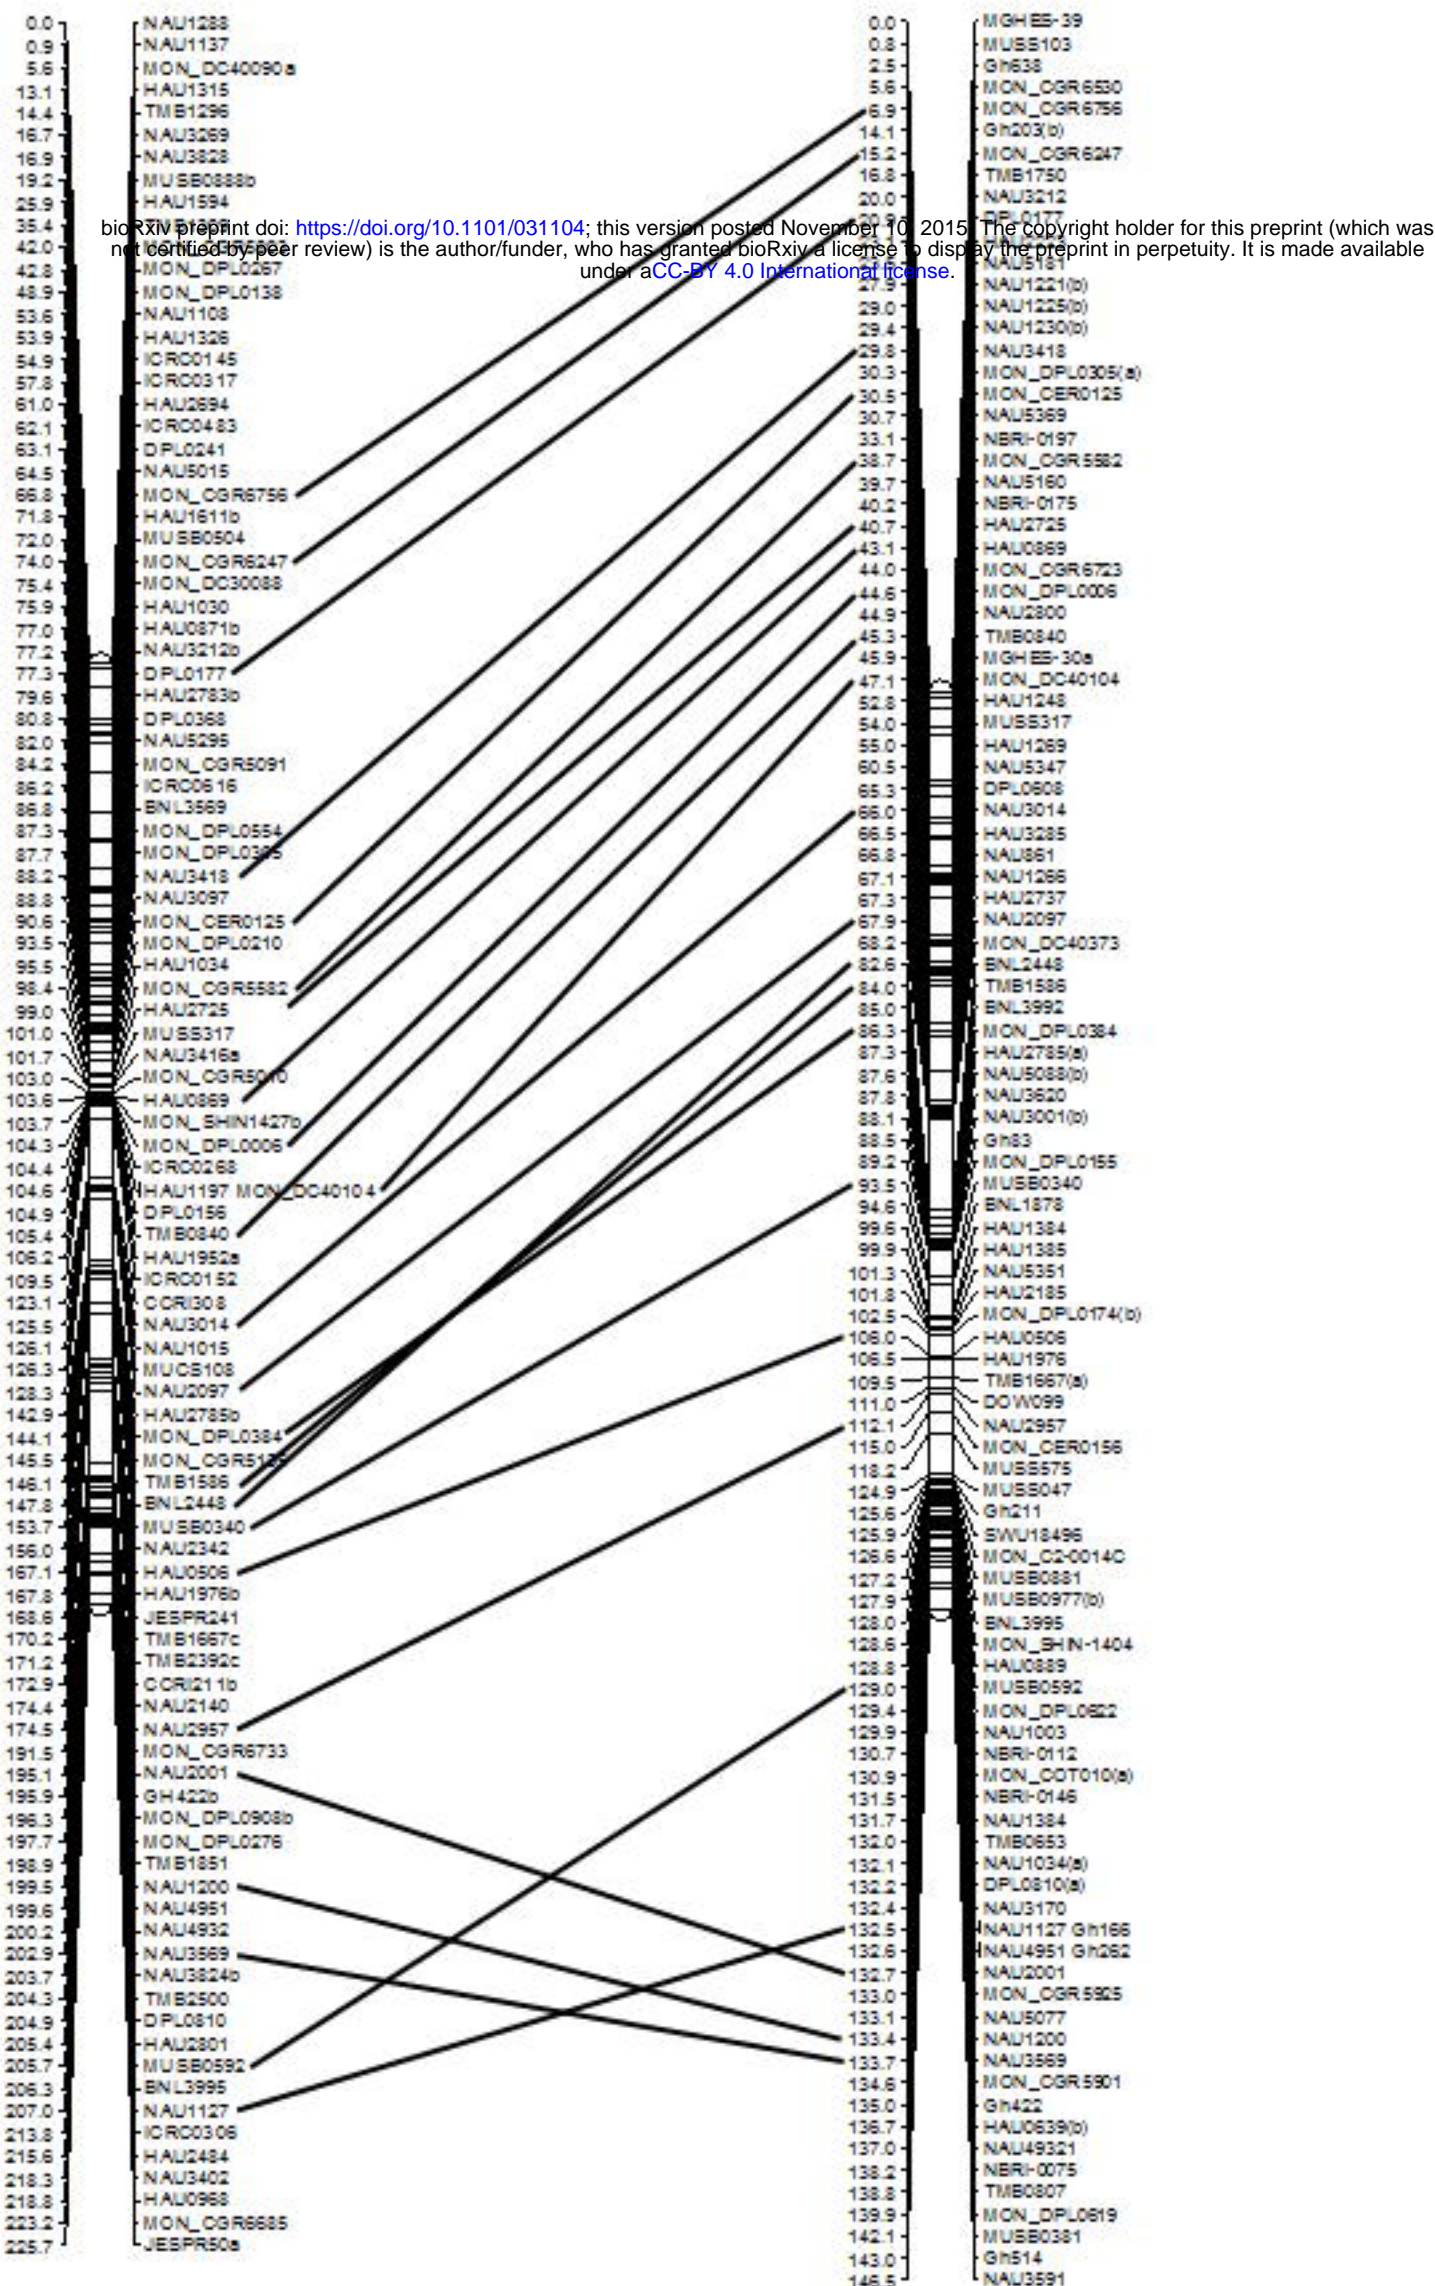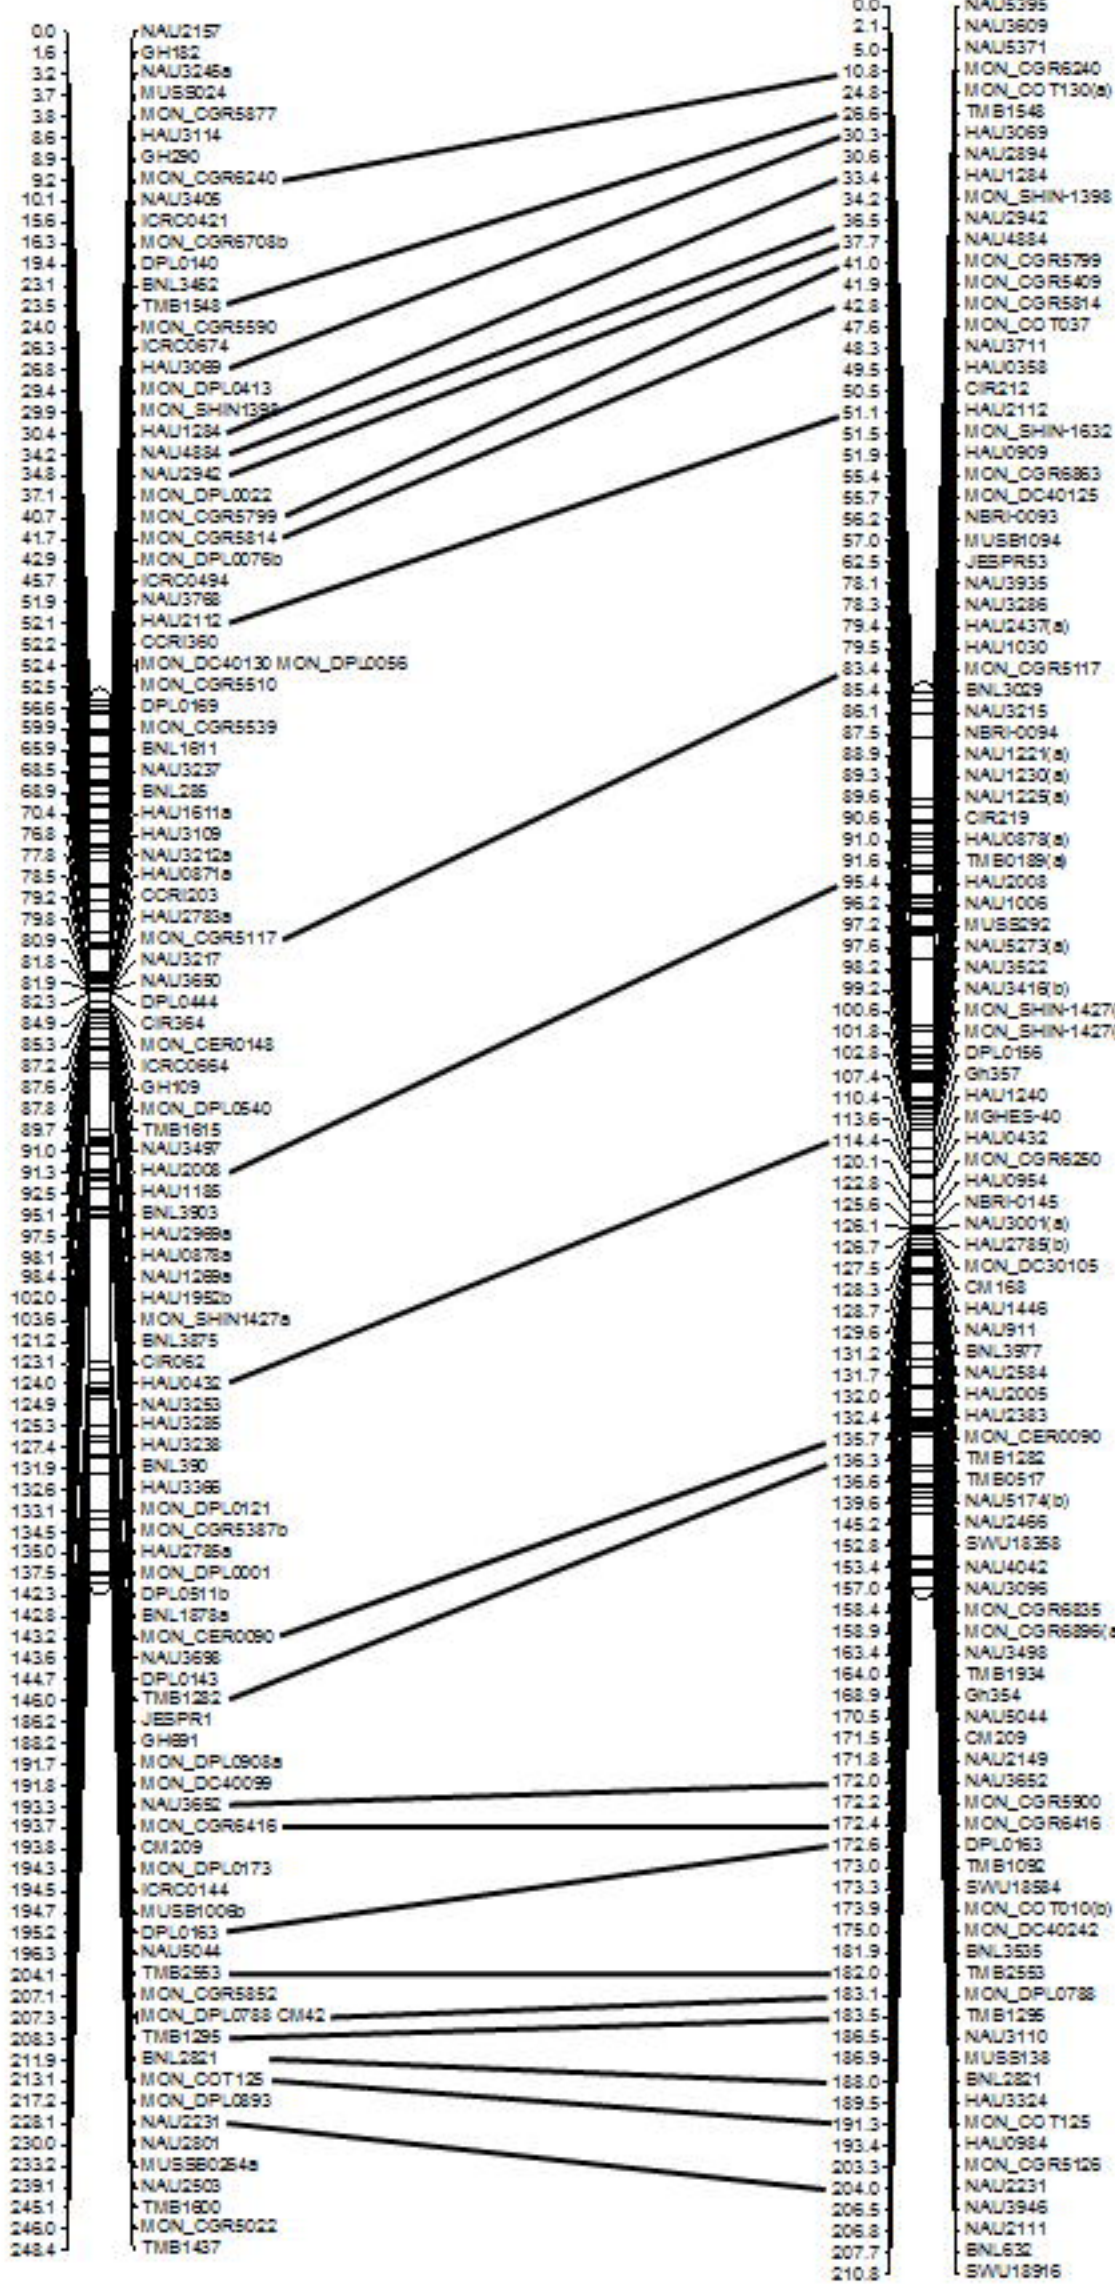



chr06Gd(A6)

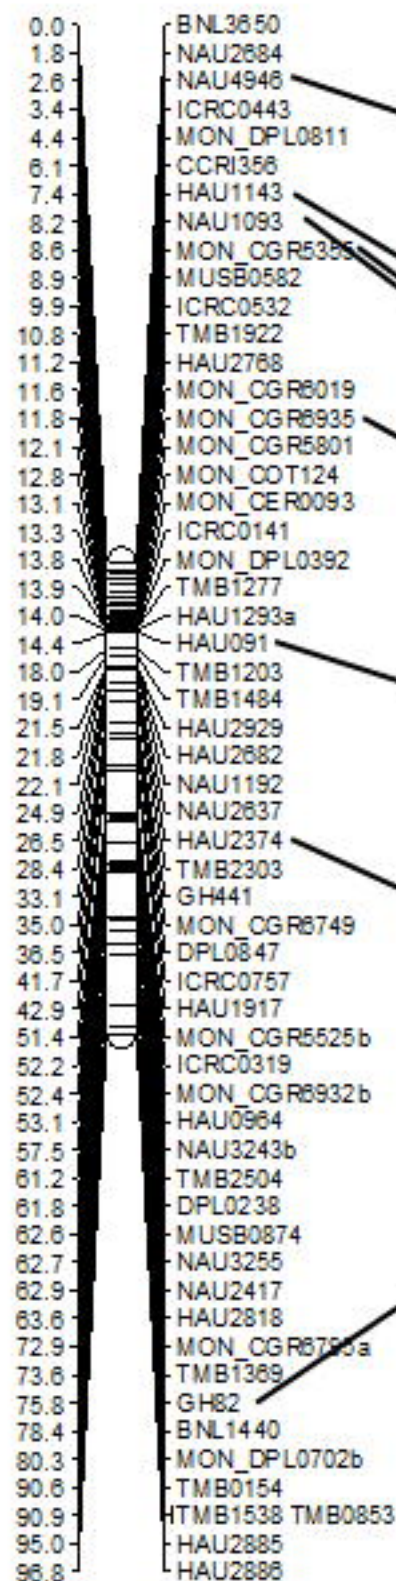

chr06Gt(A6)

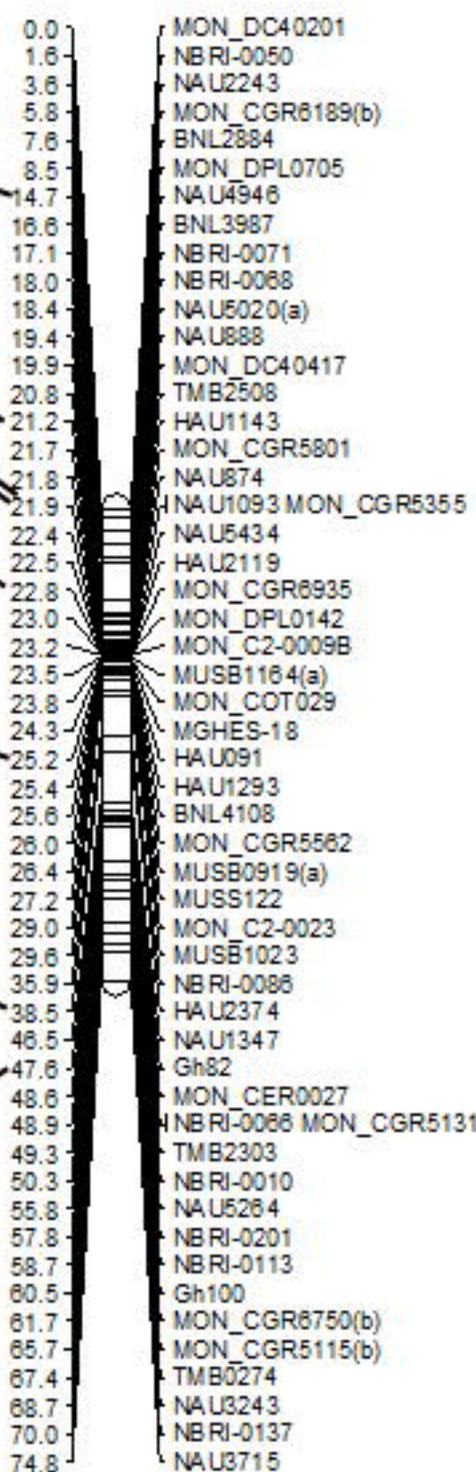

chr25Gd(D6)

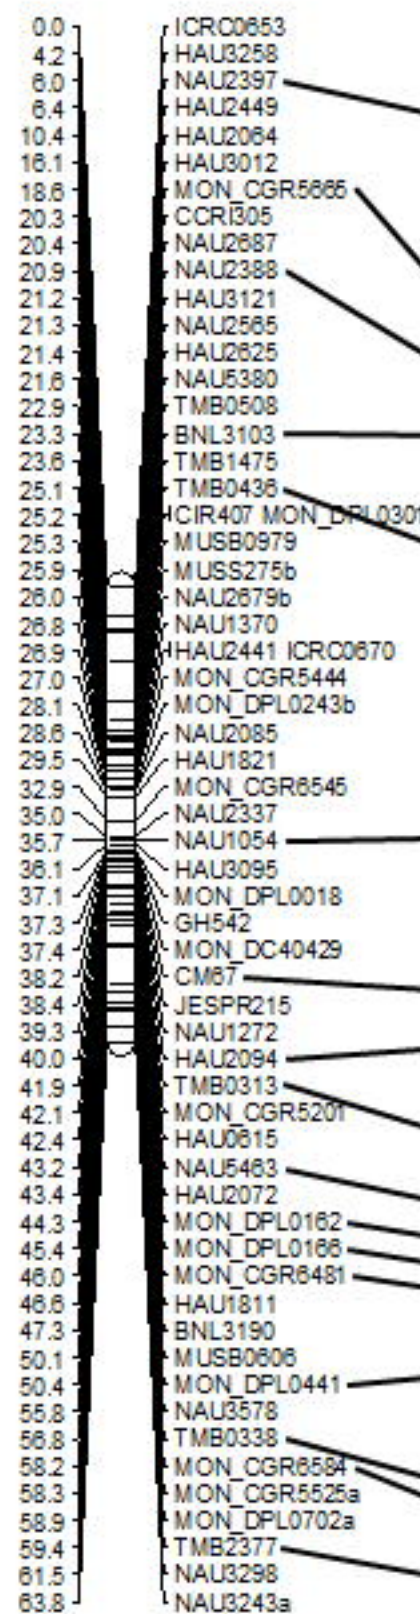

chr25Gt(D6)

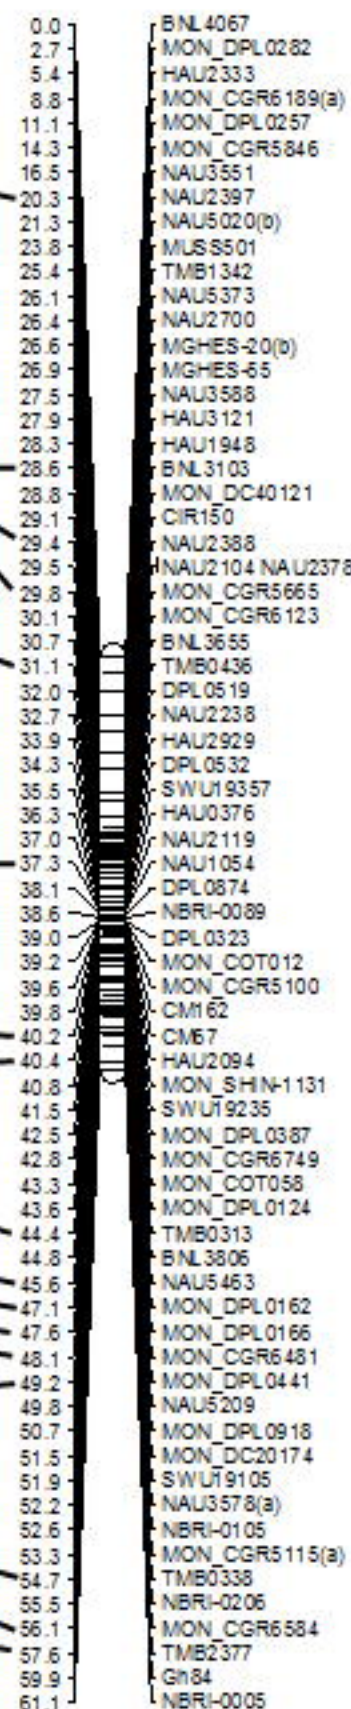



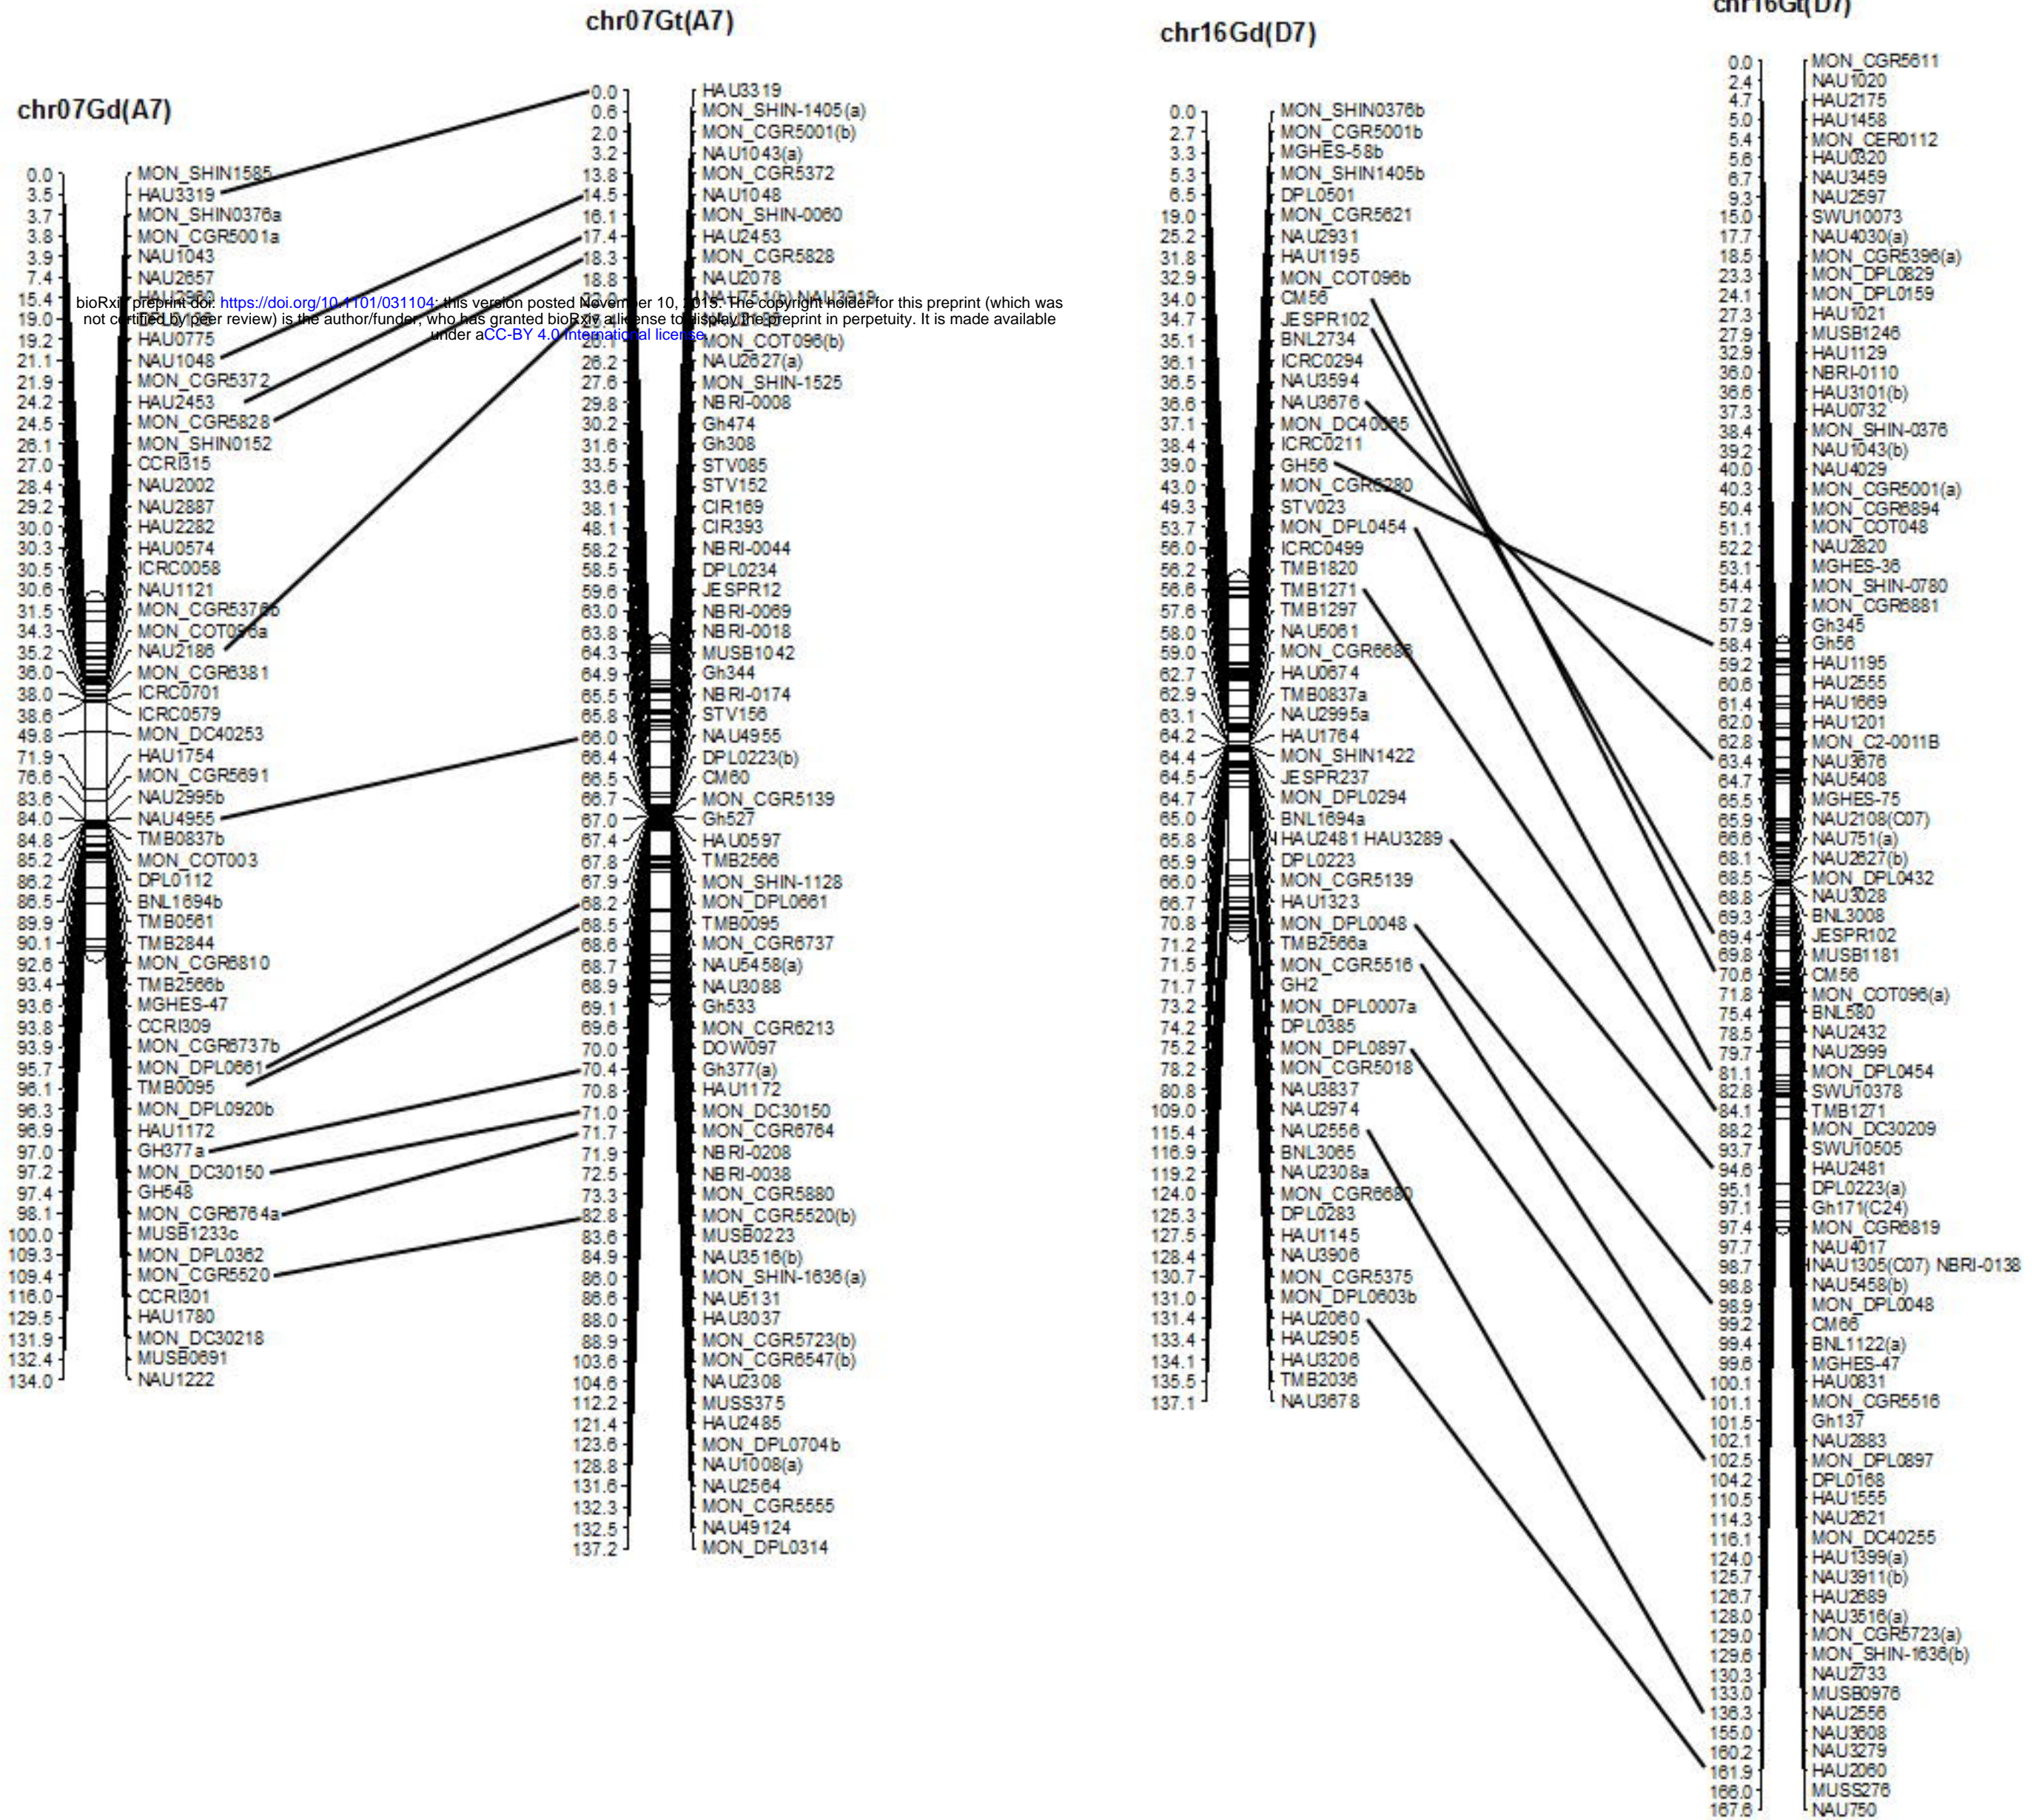



## chr08Gd(A8)

## chr08Gt (A8)

## chr24Gd(D8)

## chr24Gt (D8)

bioRxiv preprint doi: <https://doi.org/10.1101/031104>; this version posted November 10, 2015. The copyright holder for this preprint (which was not certified by peer review) is the author/funder, who has granted bioRxiv a license to display the preprint in perpetuity. It is made available under aCC-BY 4.0 International license.

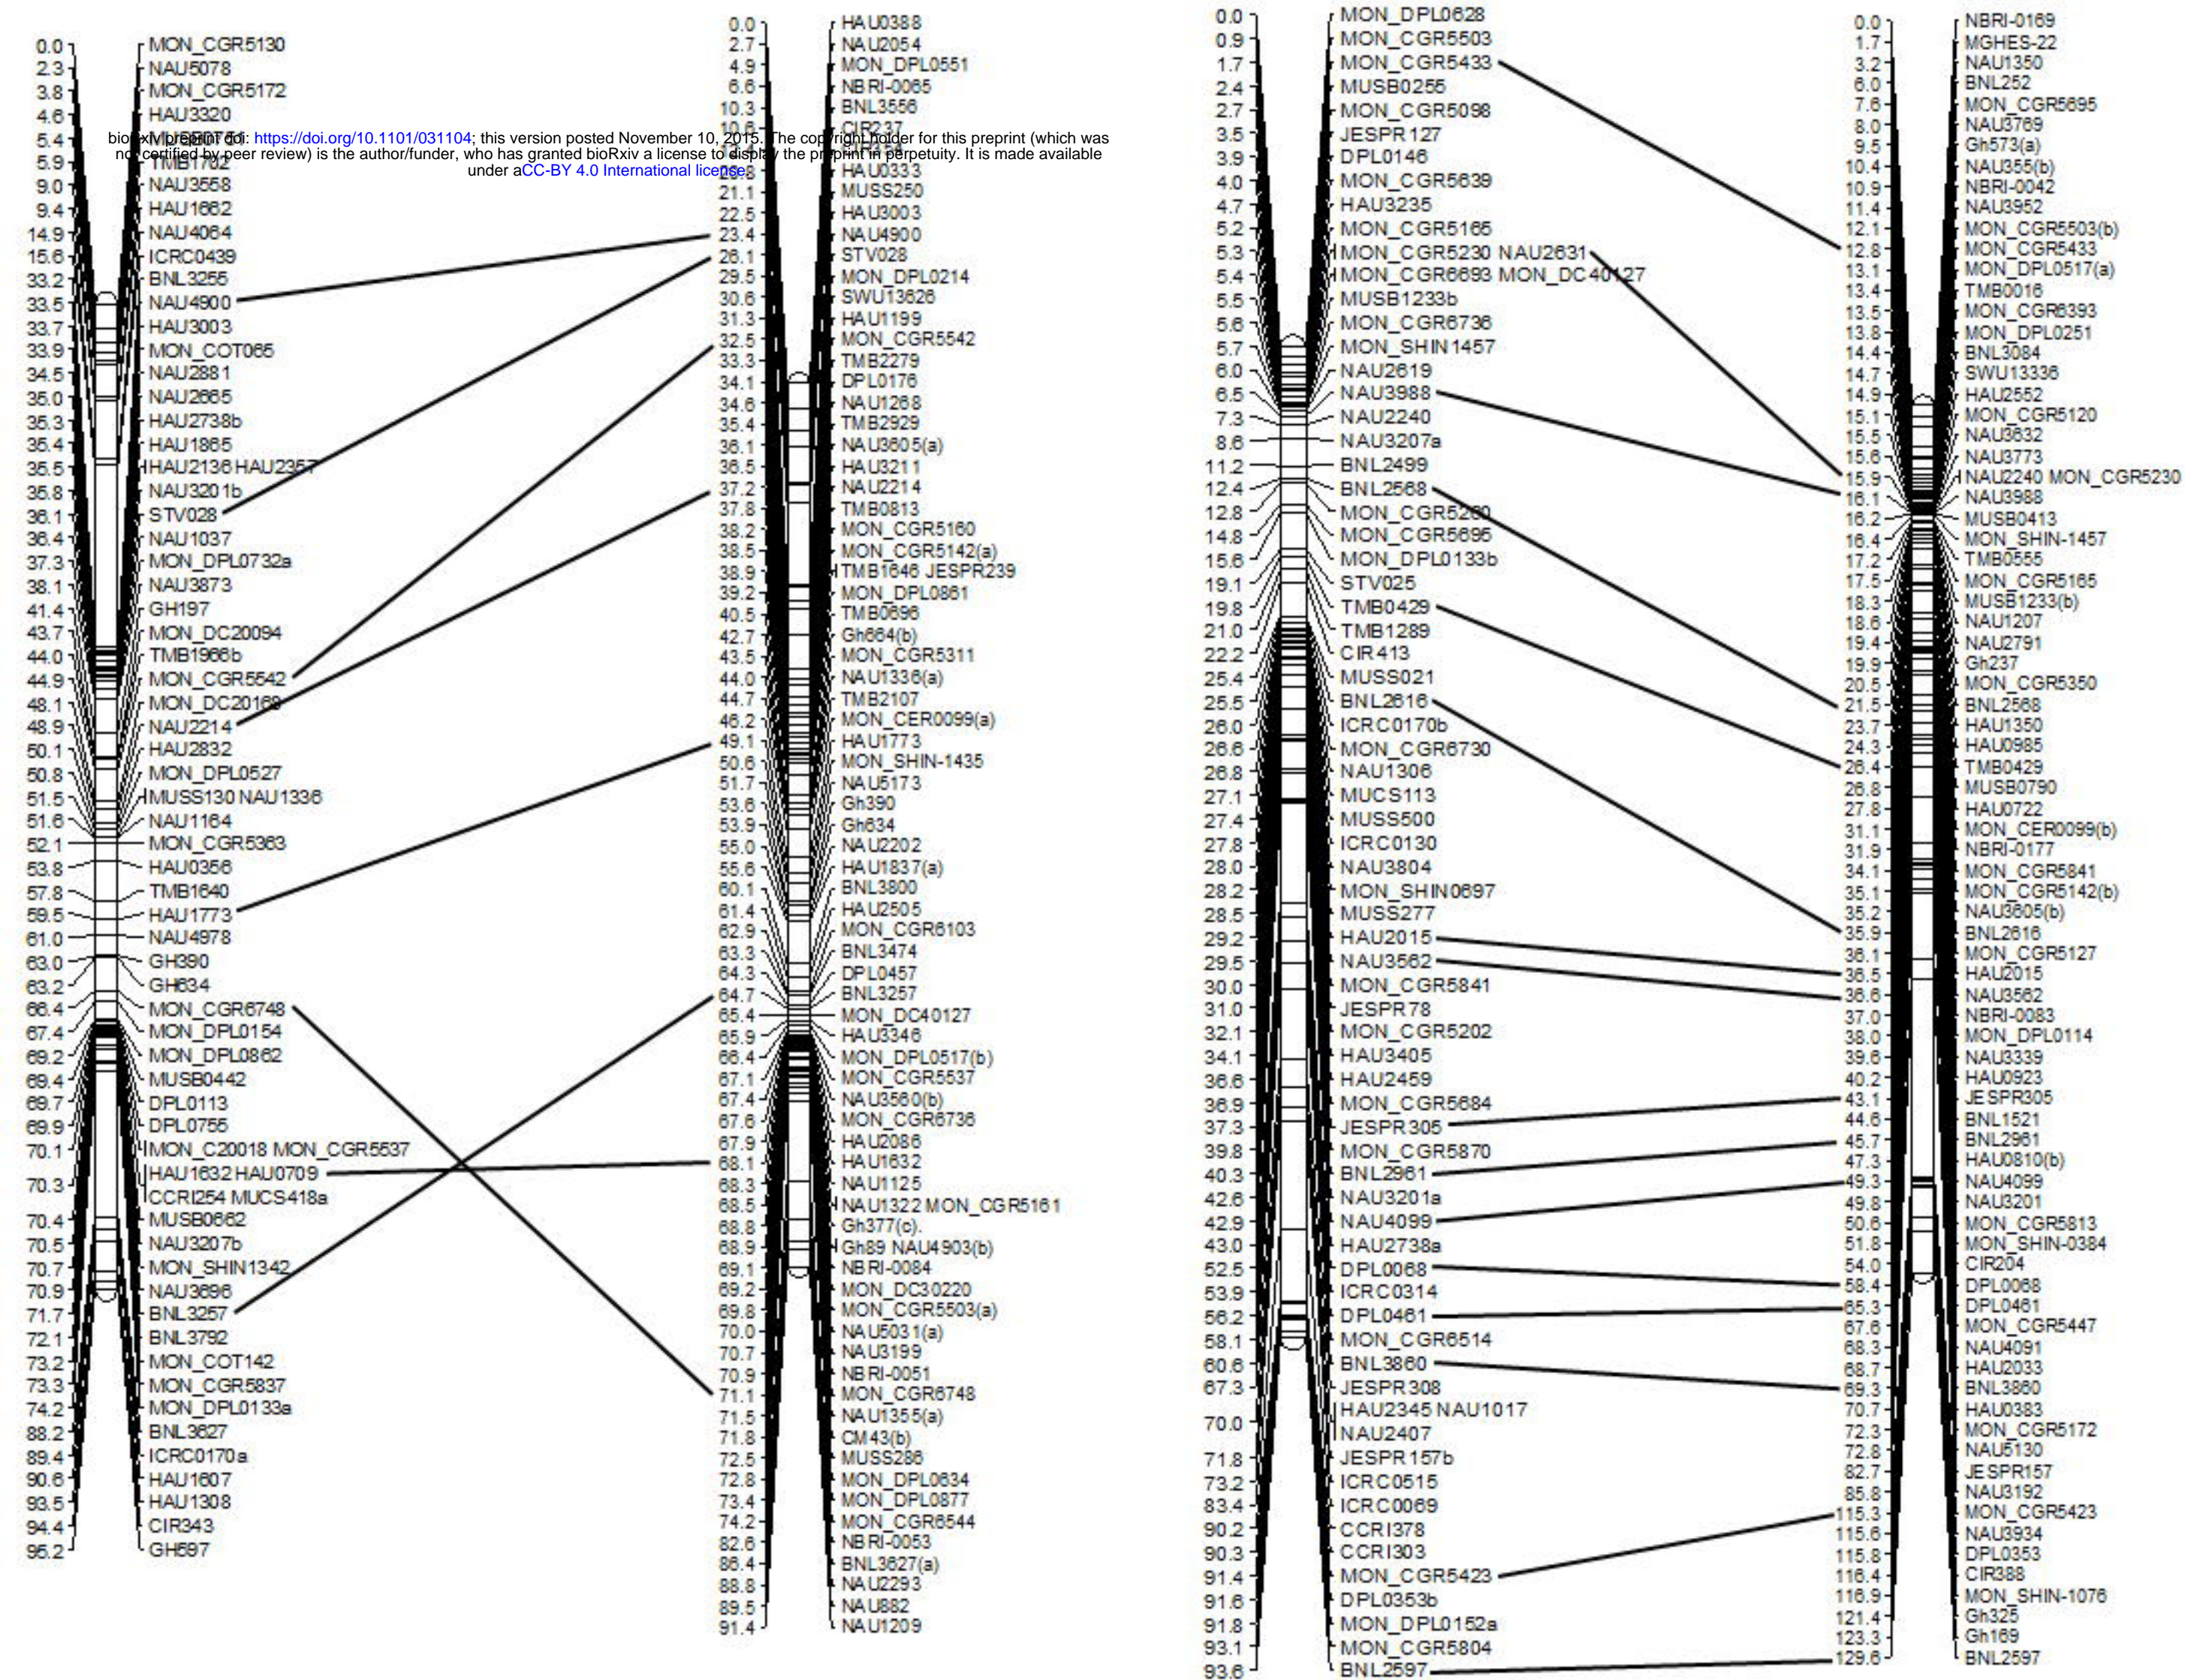



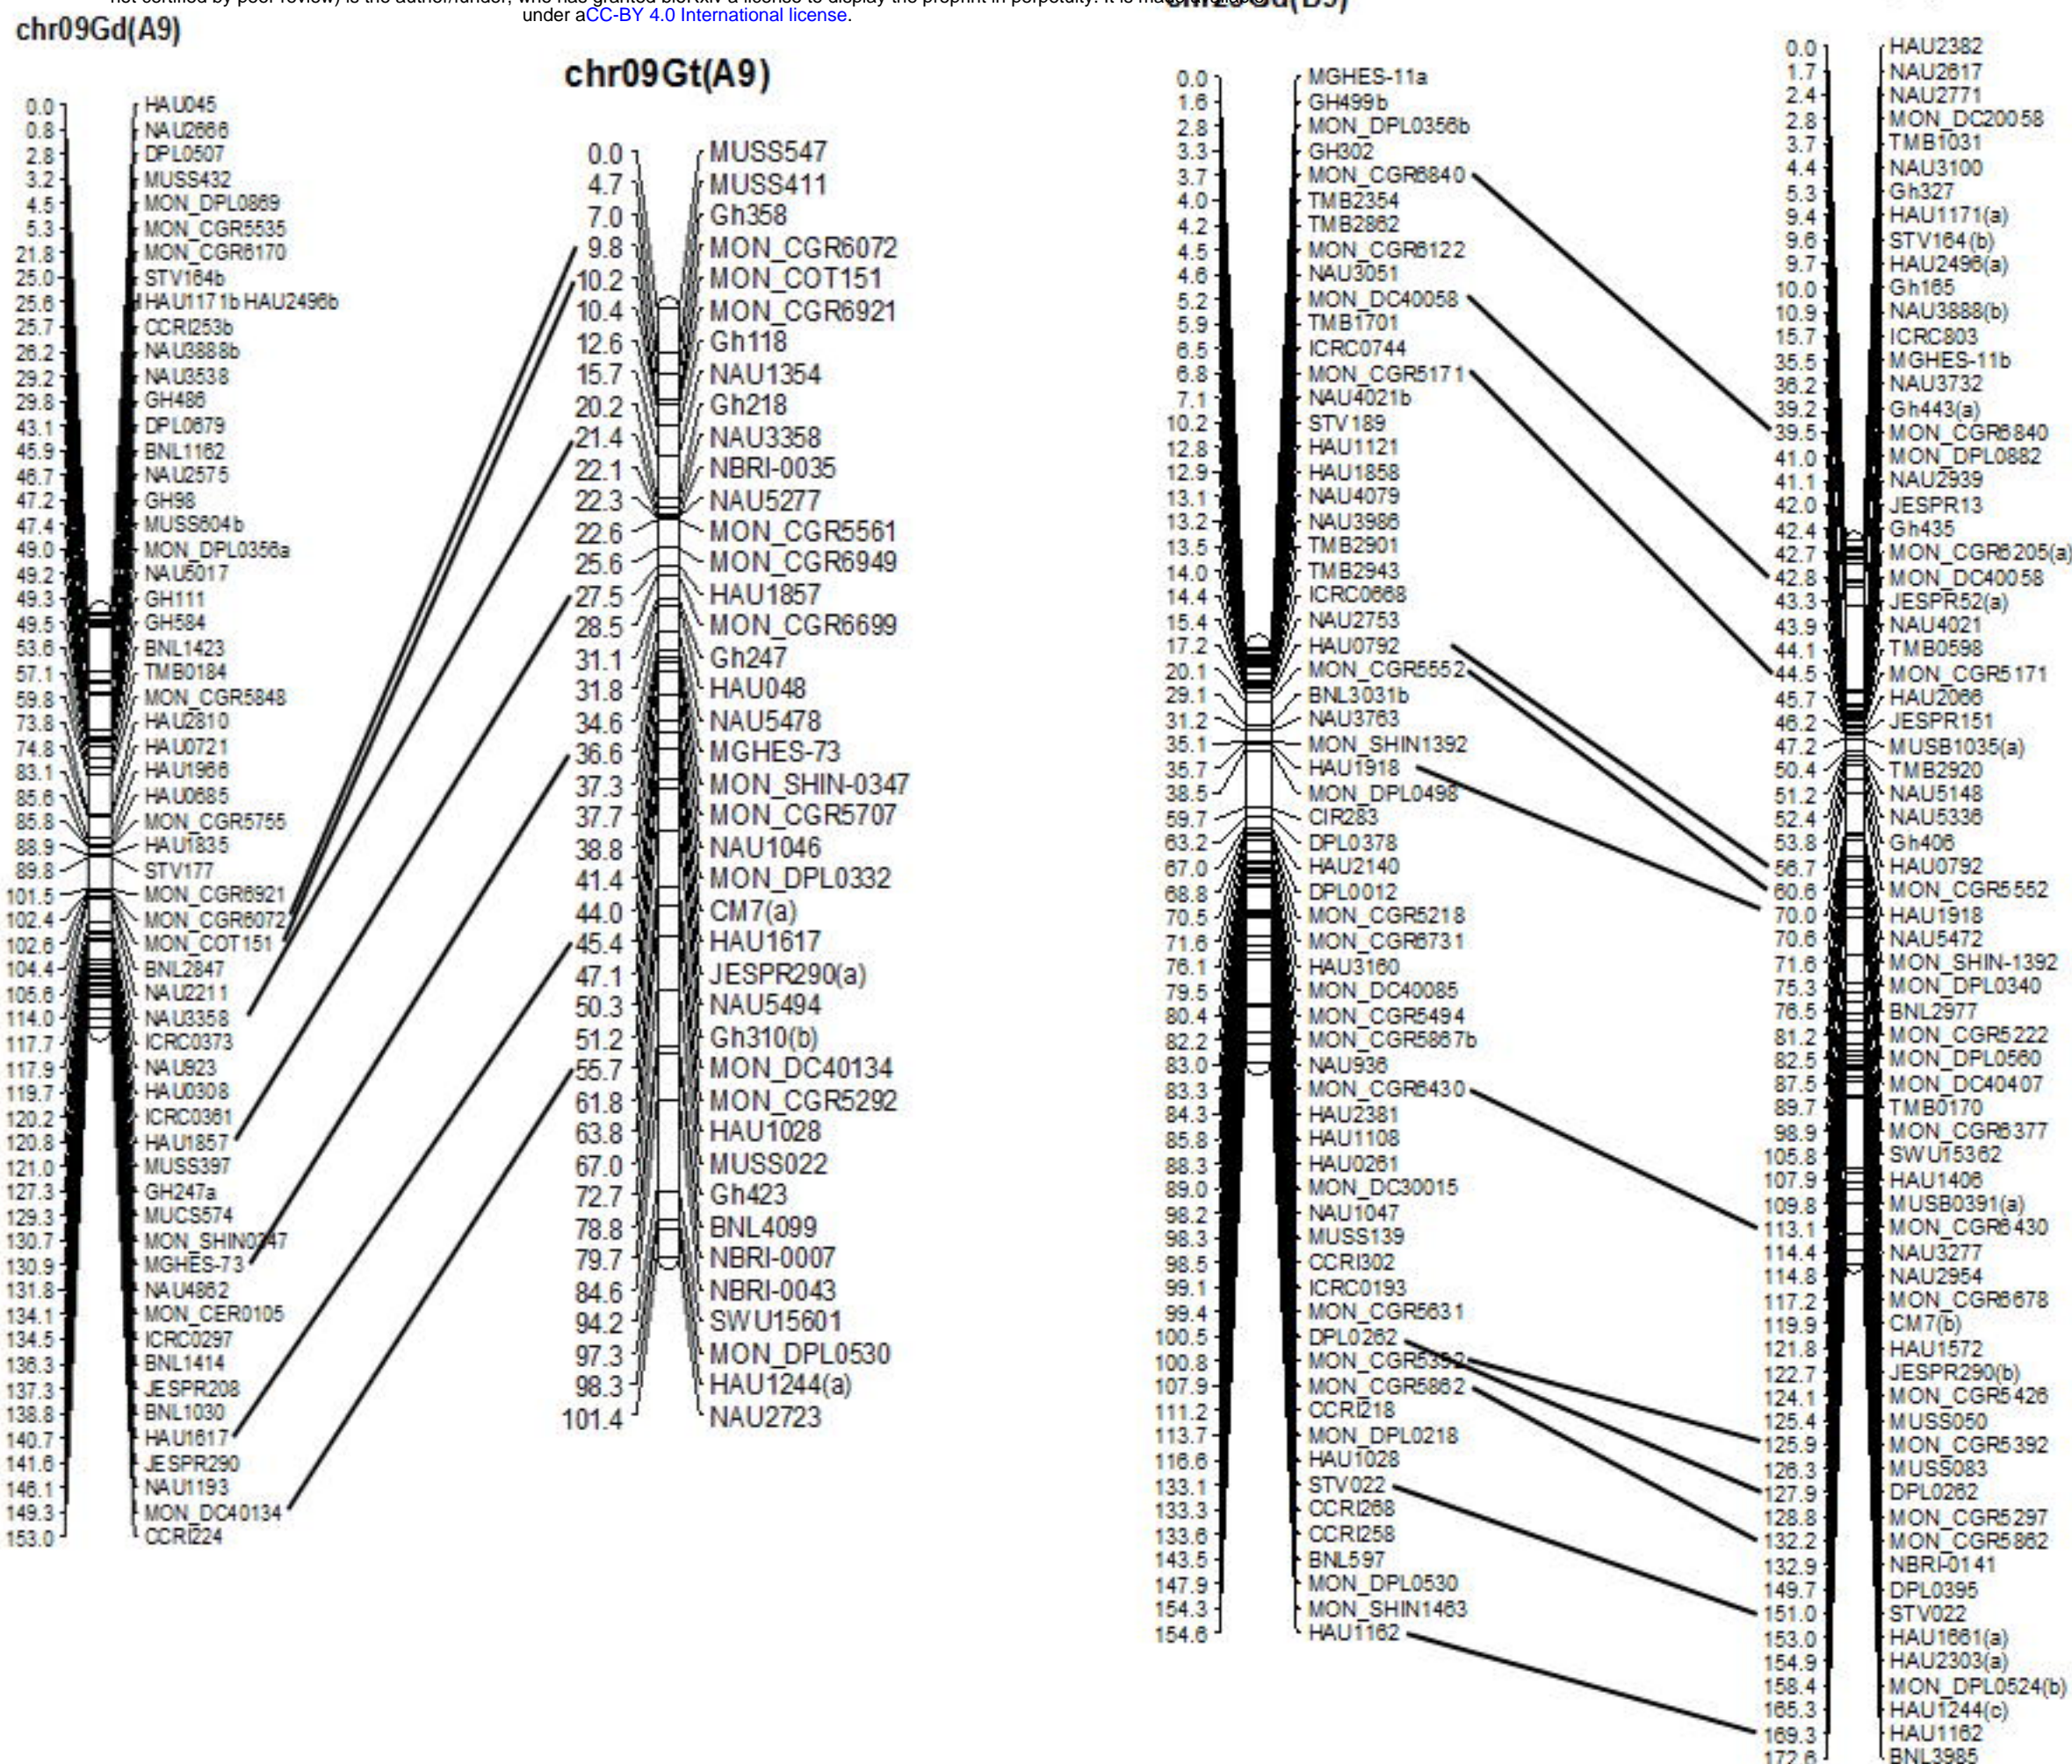



## chr10Gd(A10)

## chr10Gt(A10)

## chr20Gd(D10)

## chr20Gt(D10)

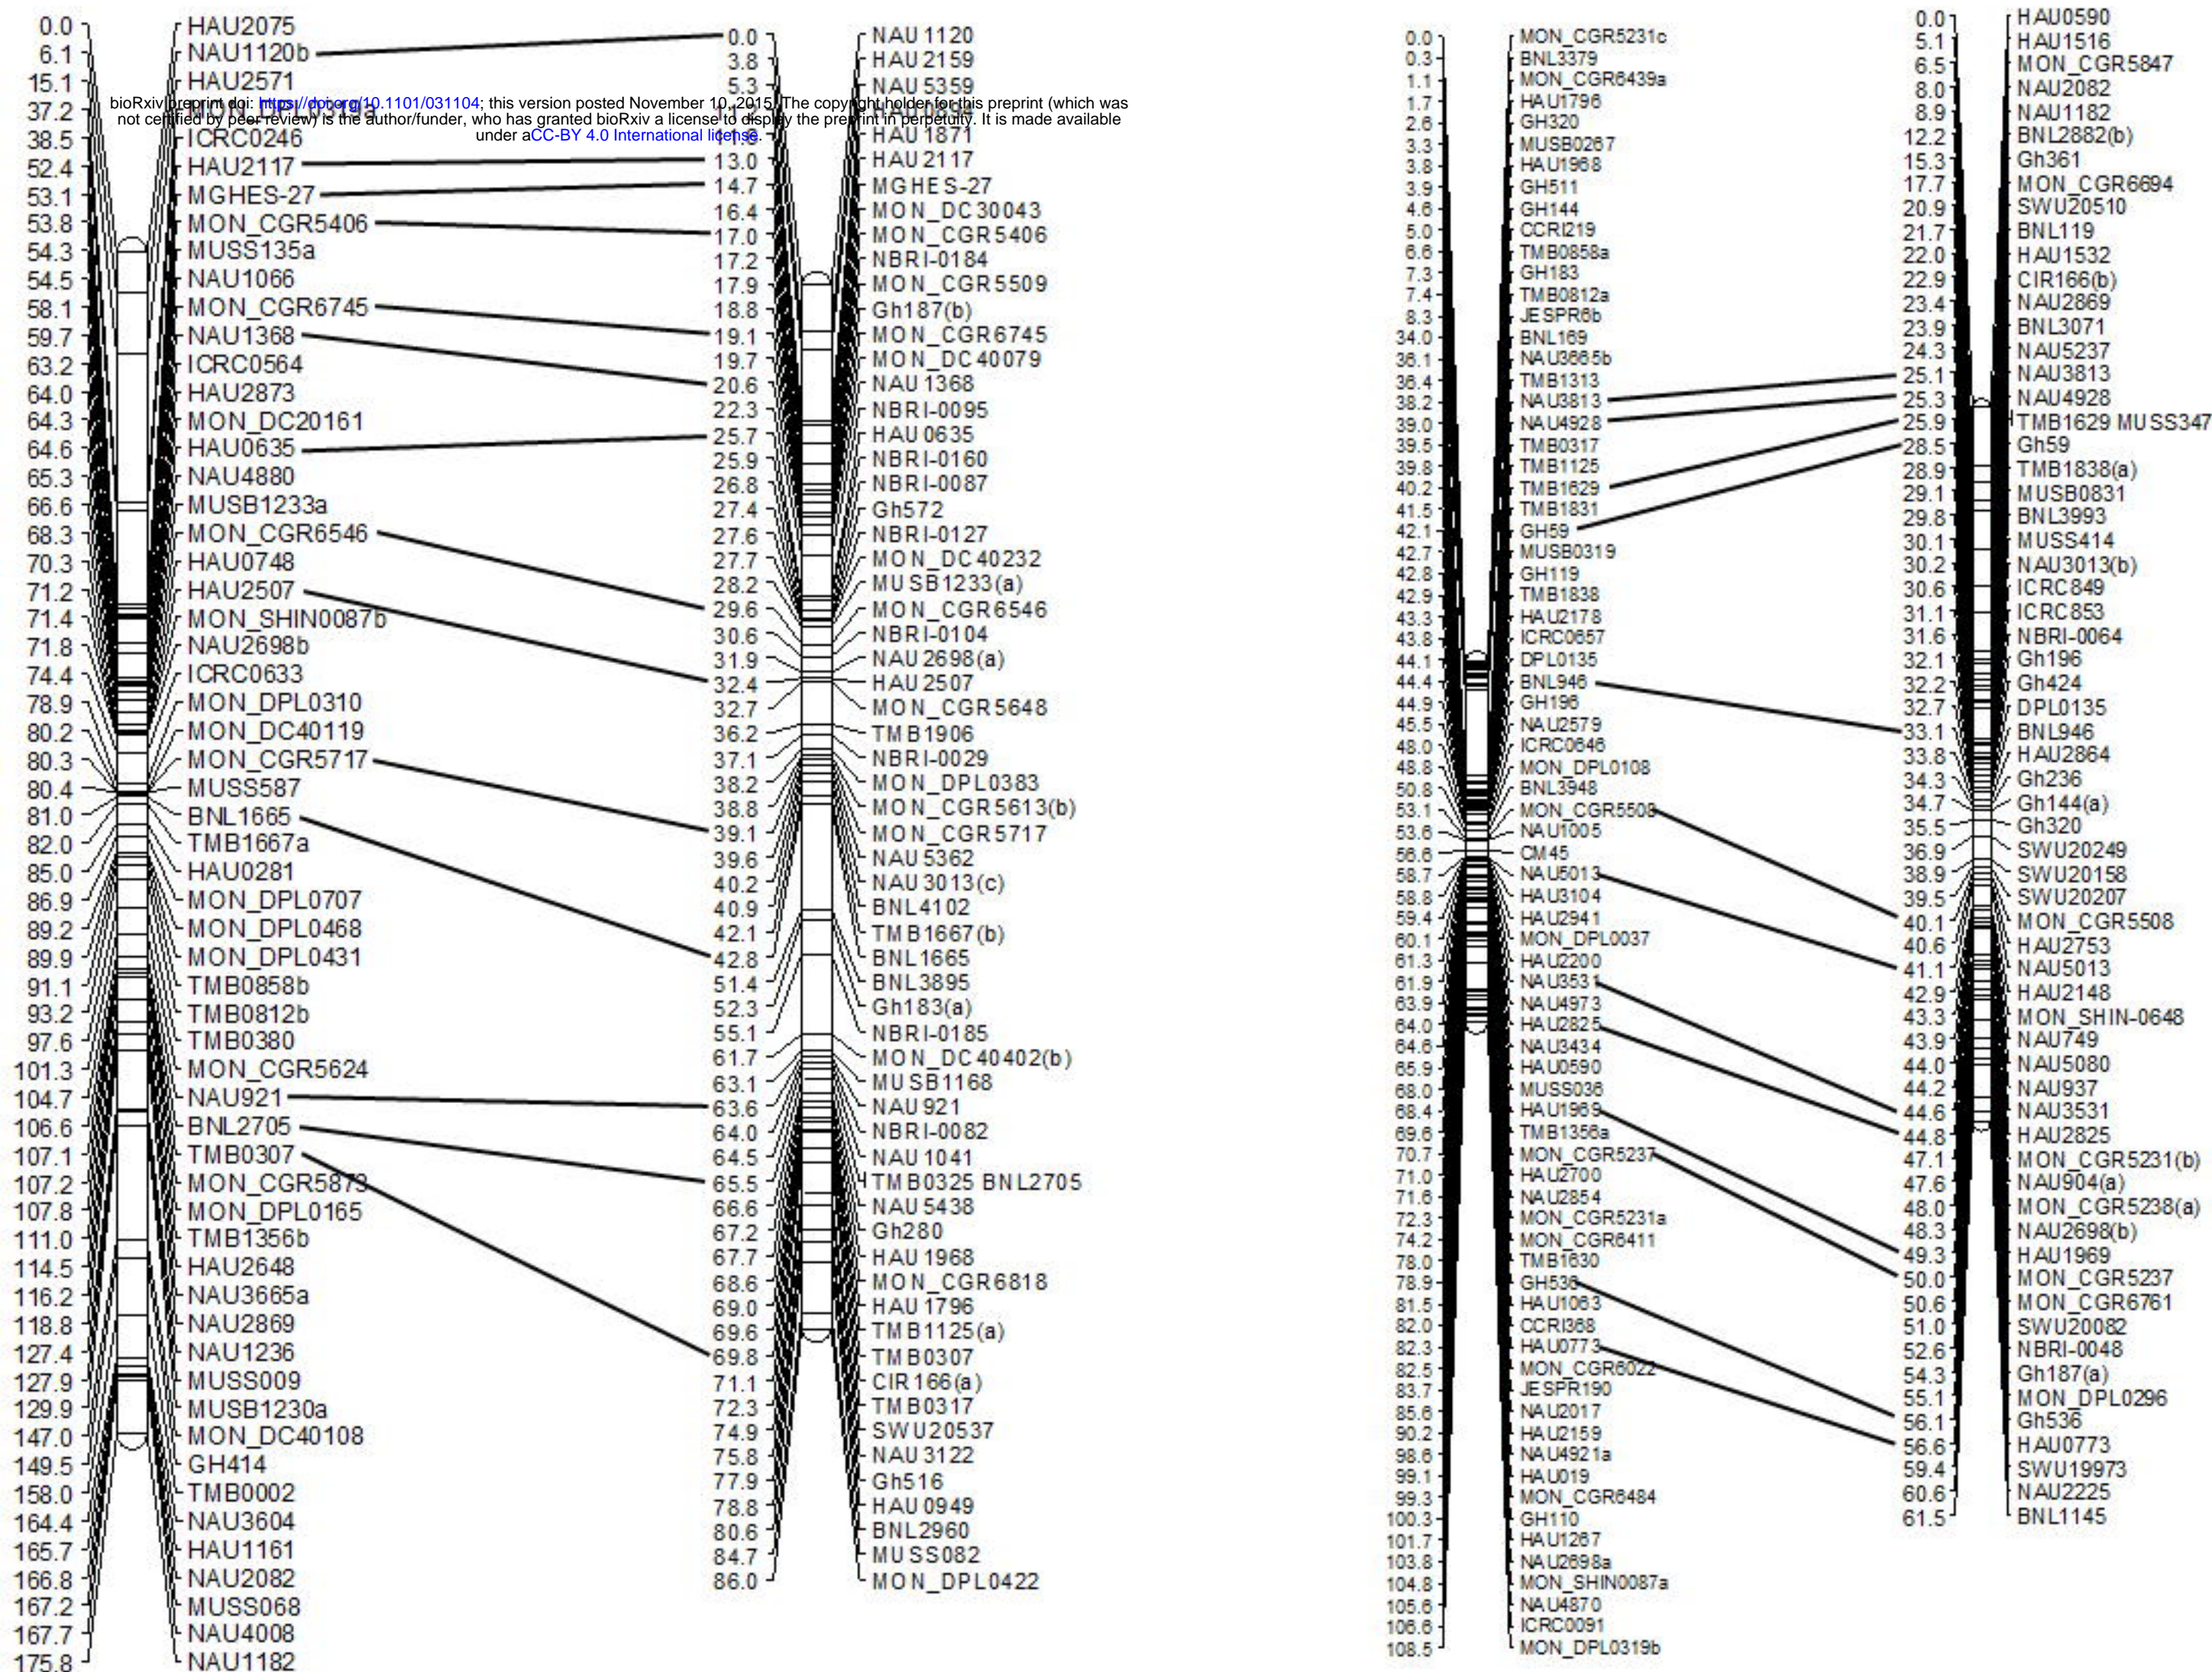



## chr11Gt(A11)

## chr21Gd(D11)

## chr21Gt(D11)

## chr11Gd(A11)

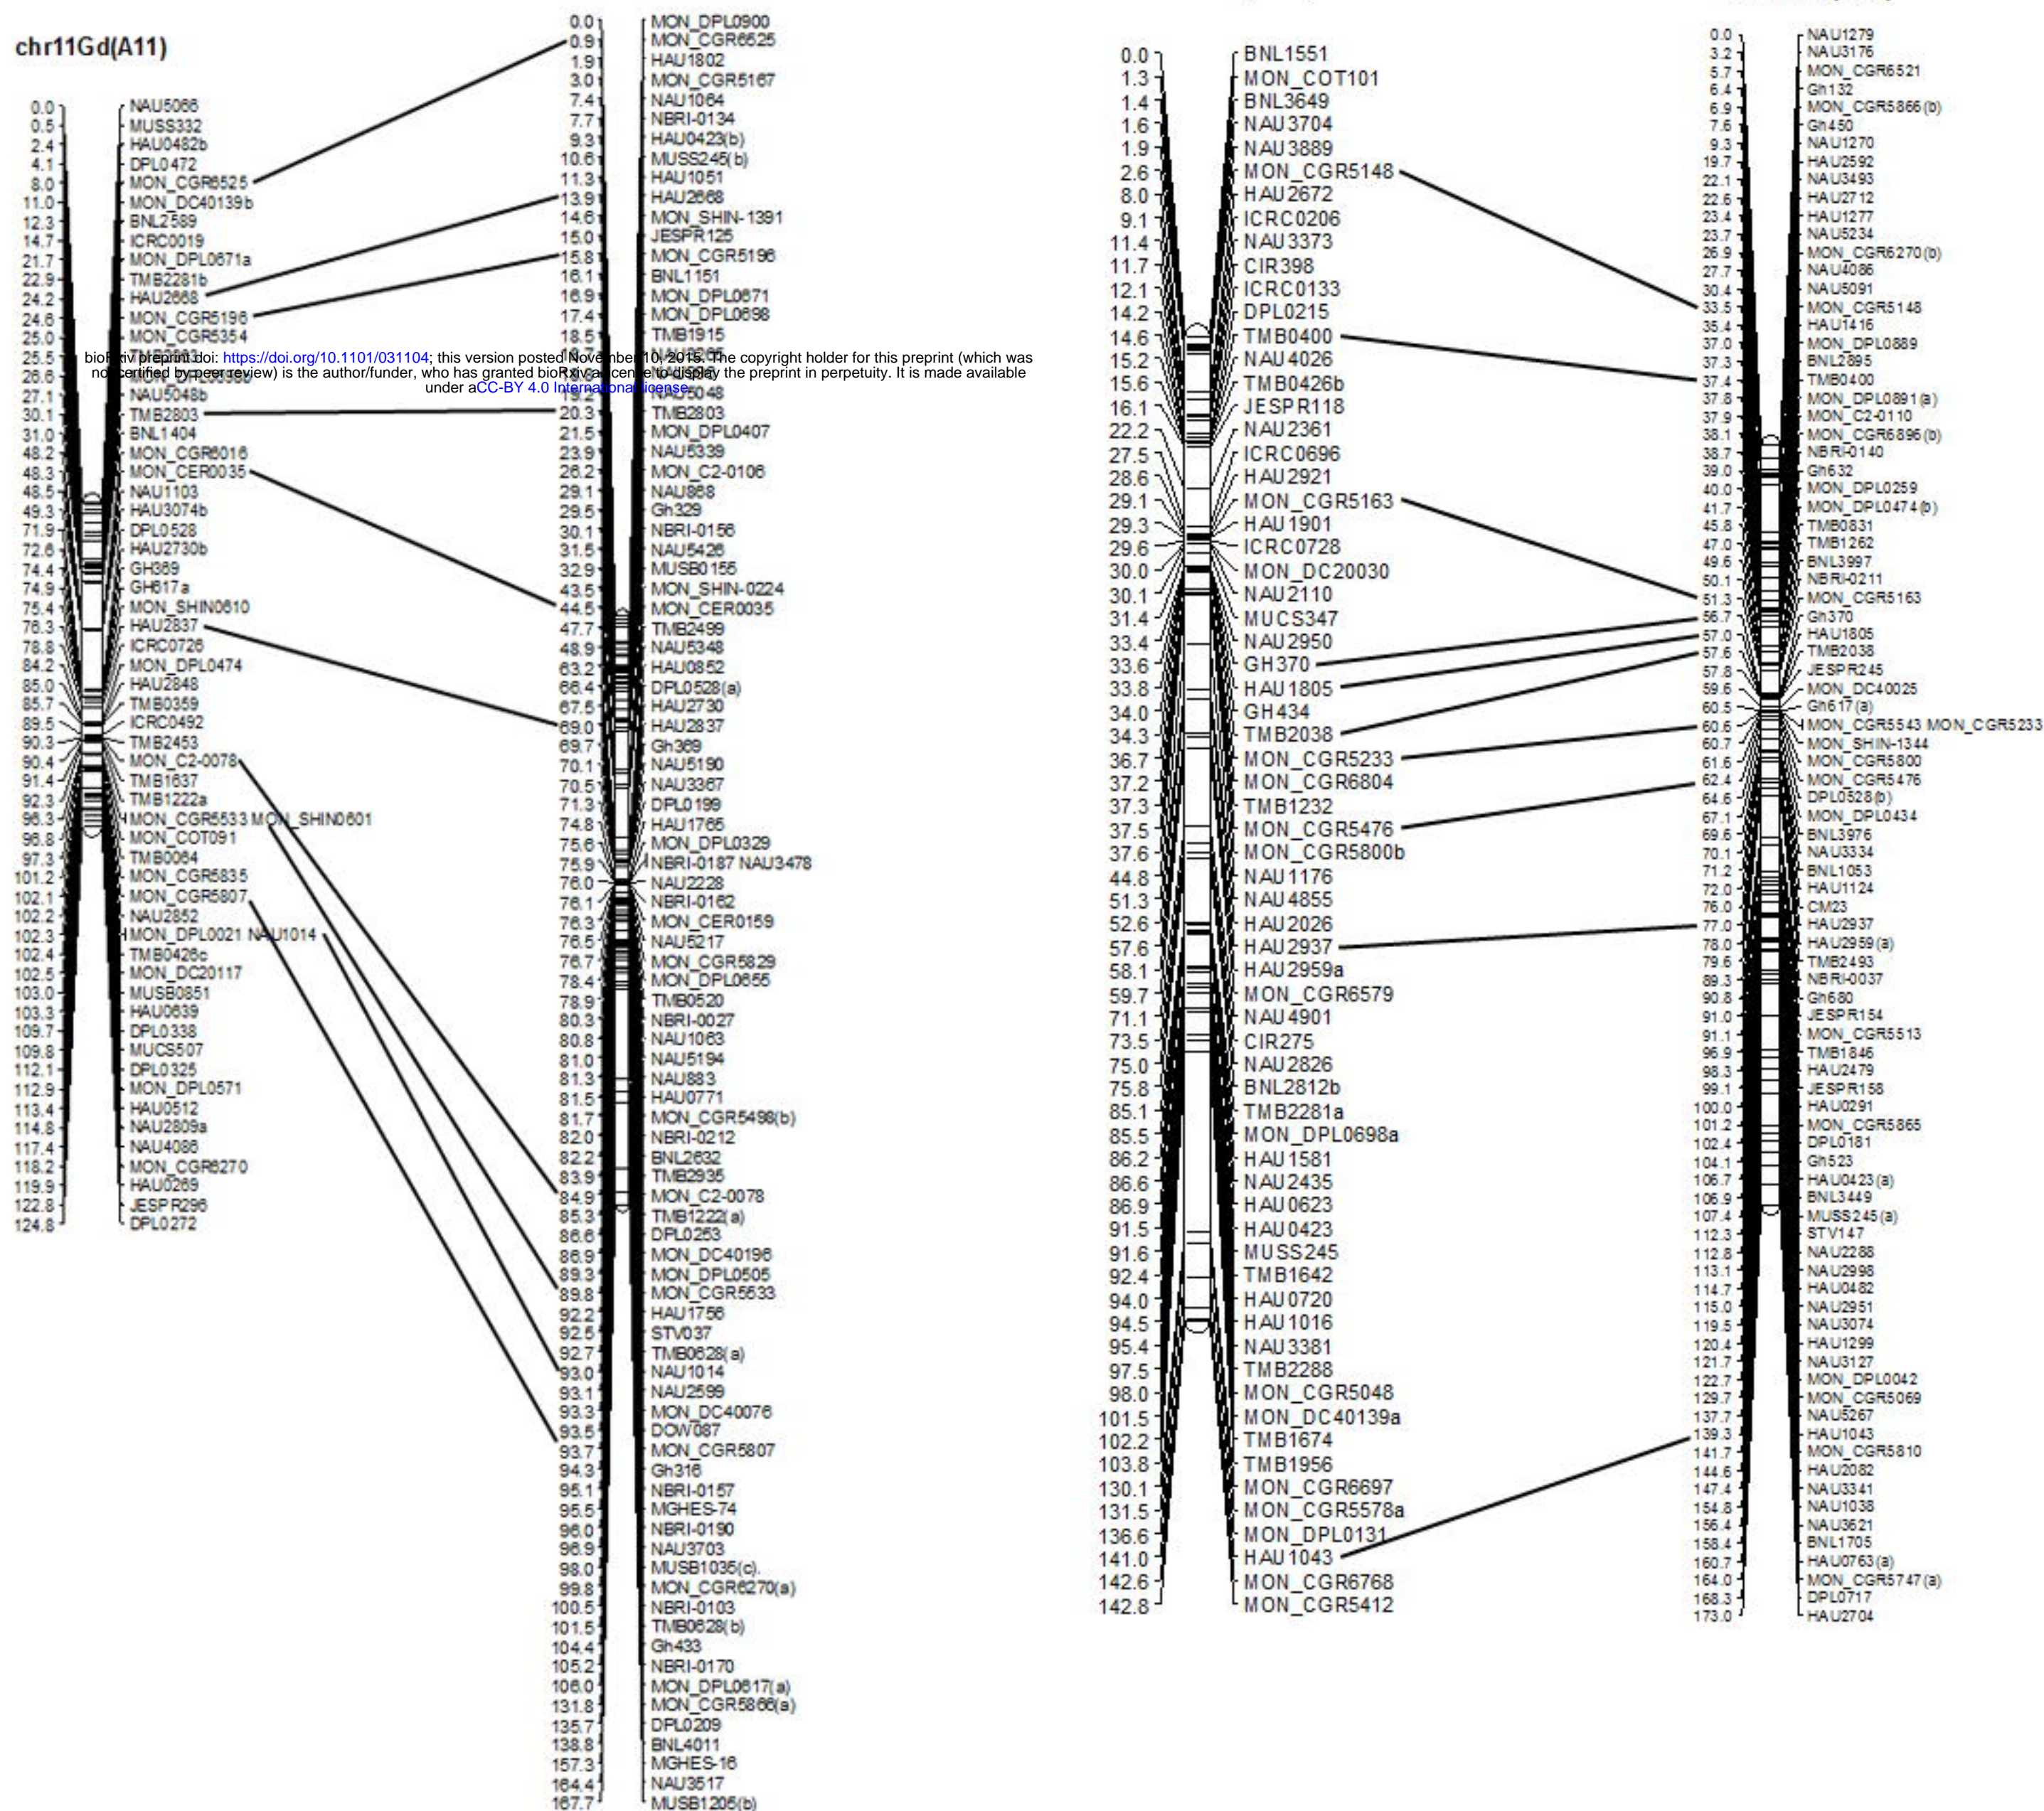



## chr12Gd(A12)

## chr12Gt(A12)

## chr26Gd(D12)

## chr26Gt(D12)

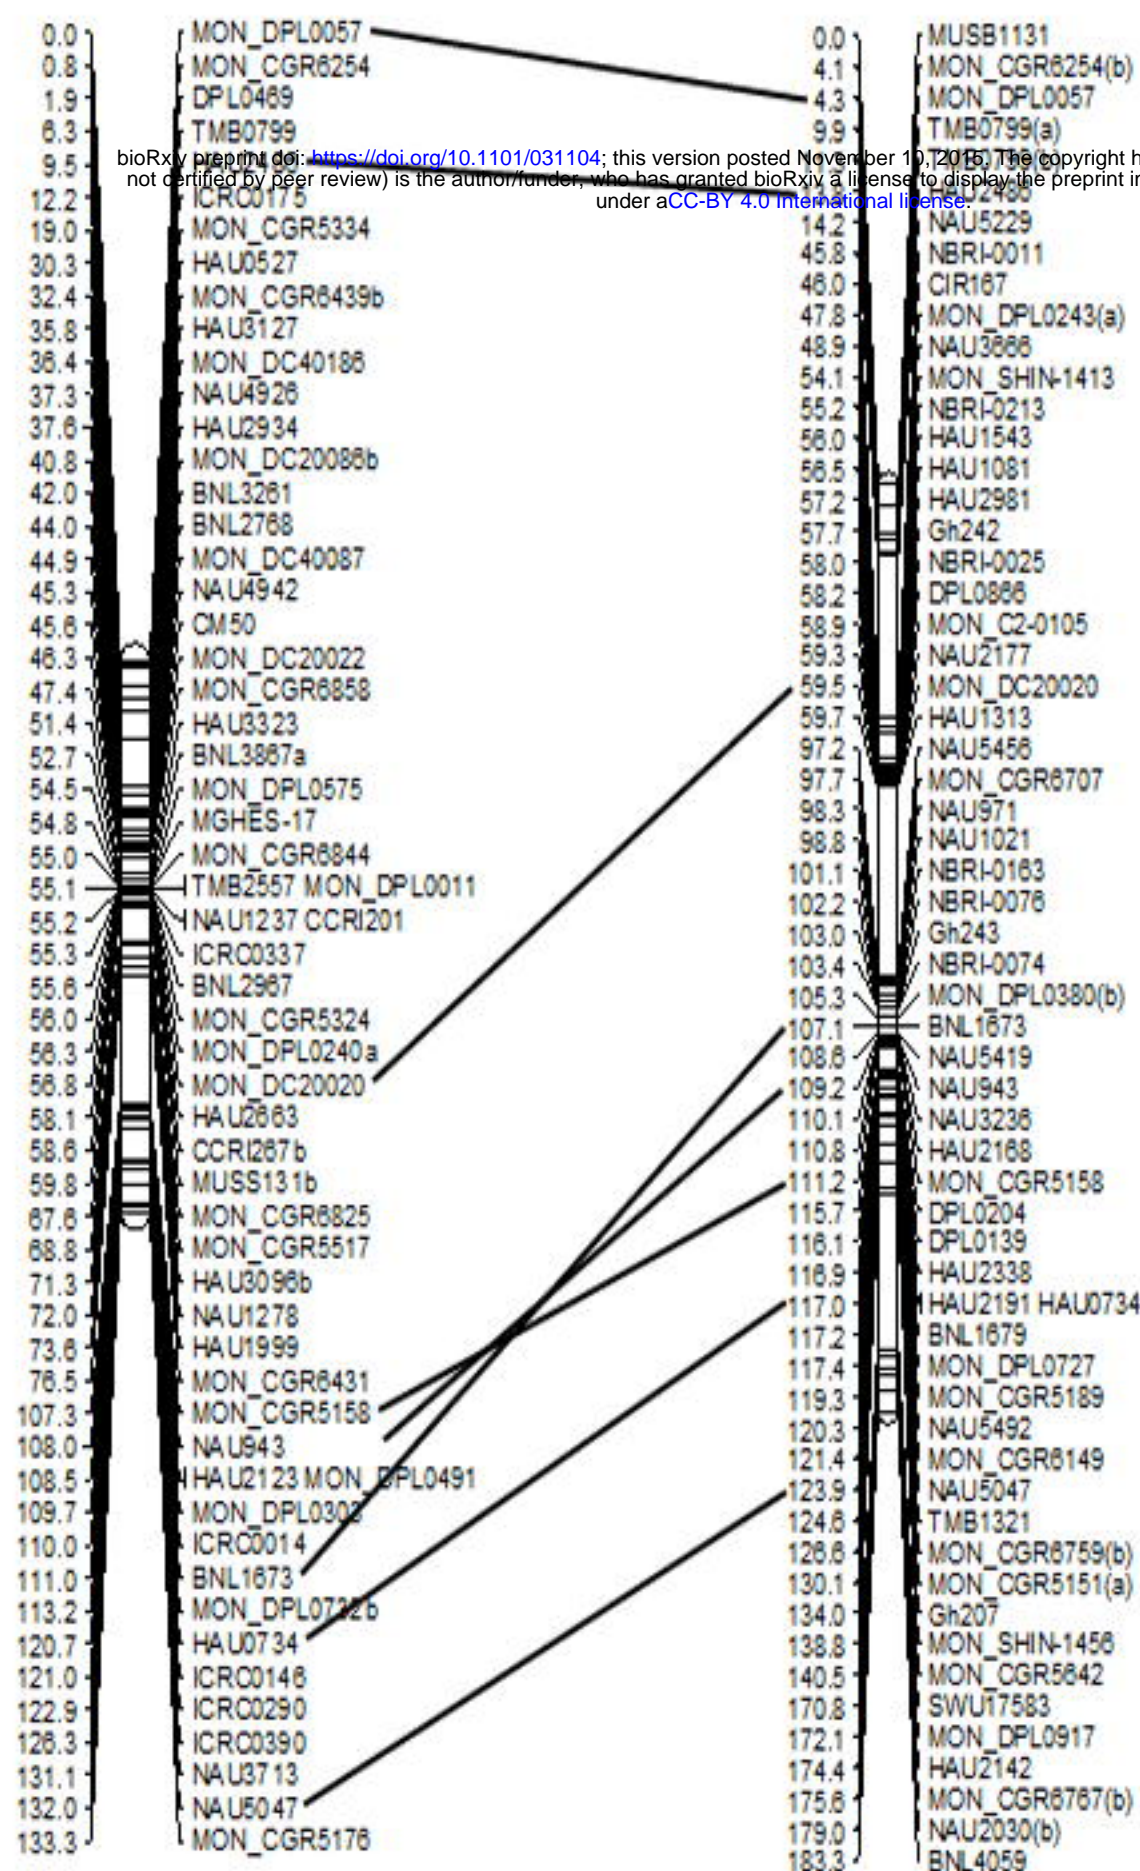

bioRxiv preprint doi: <https://doi.org/10.1101/031104>; this version posted November 10, 2015. The copyright holder for this preprint (which was not certified by peer review) is the author/funder, who has granted bioRxiv a license to display the preprint in perpetuity. It is made available under aCC-BY 4.0 International license.

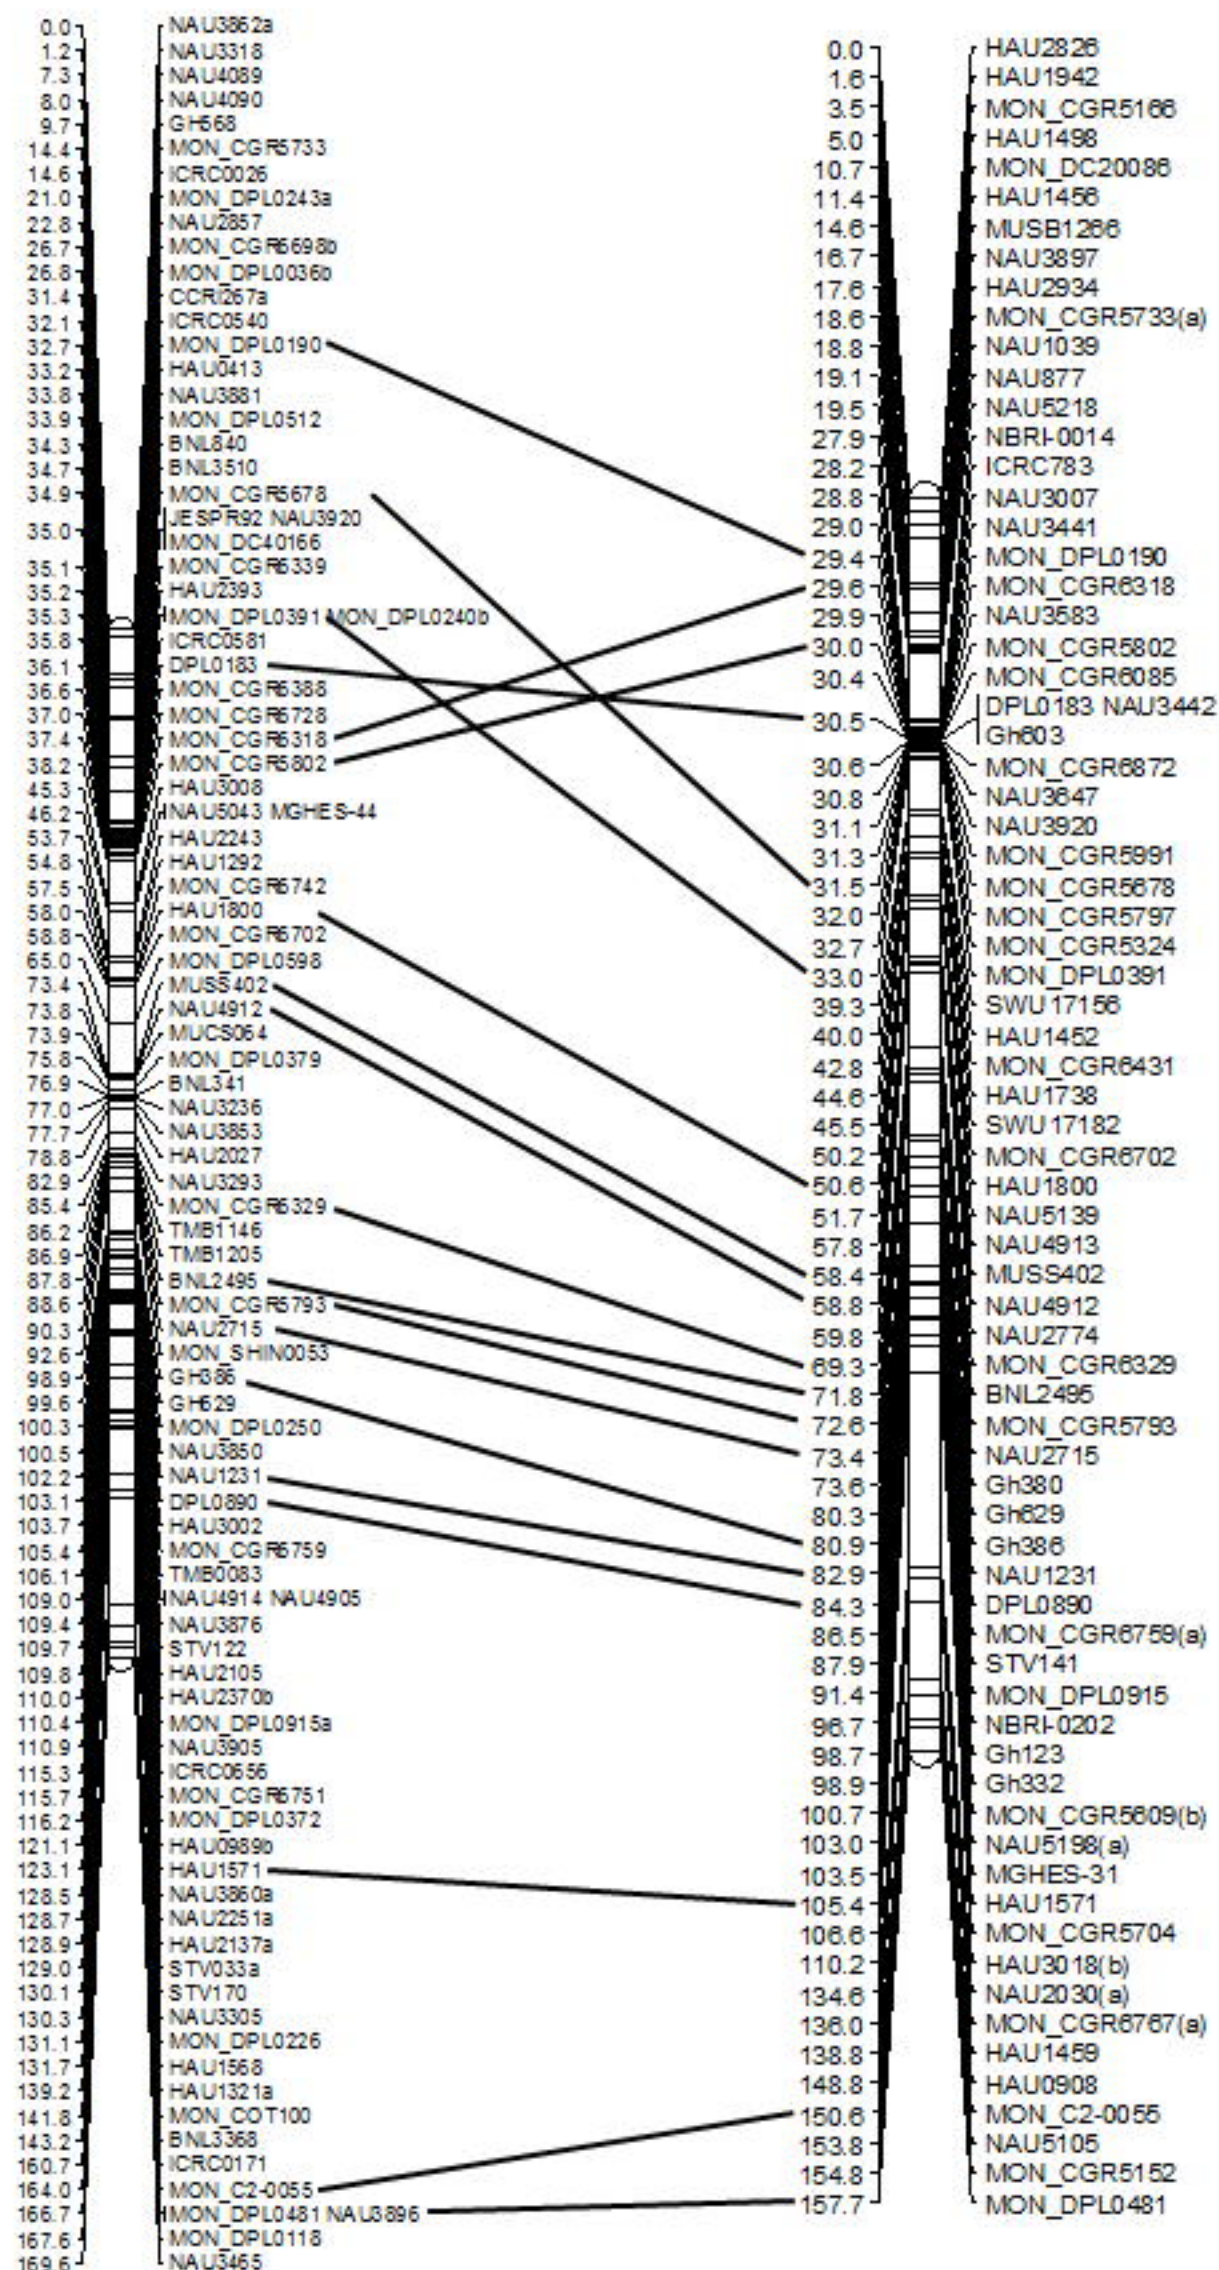



## chr13Gd(A13)

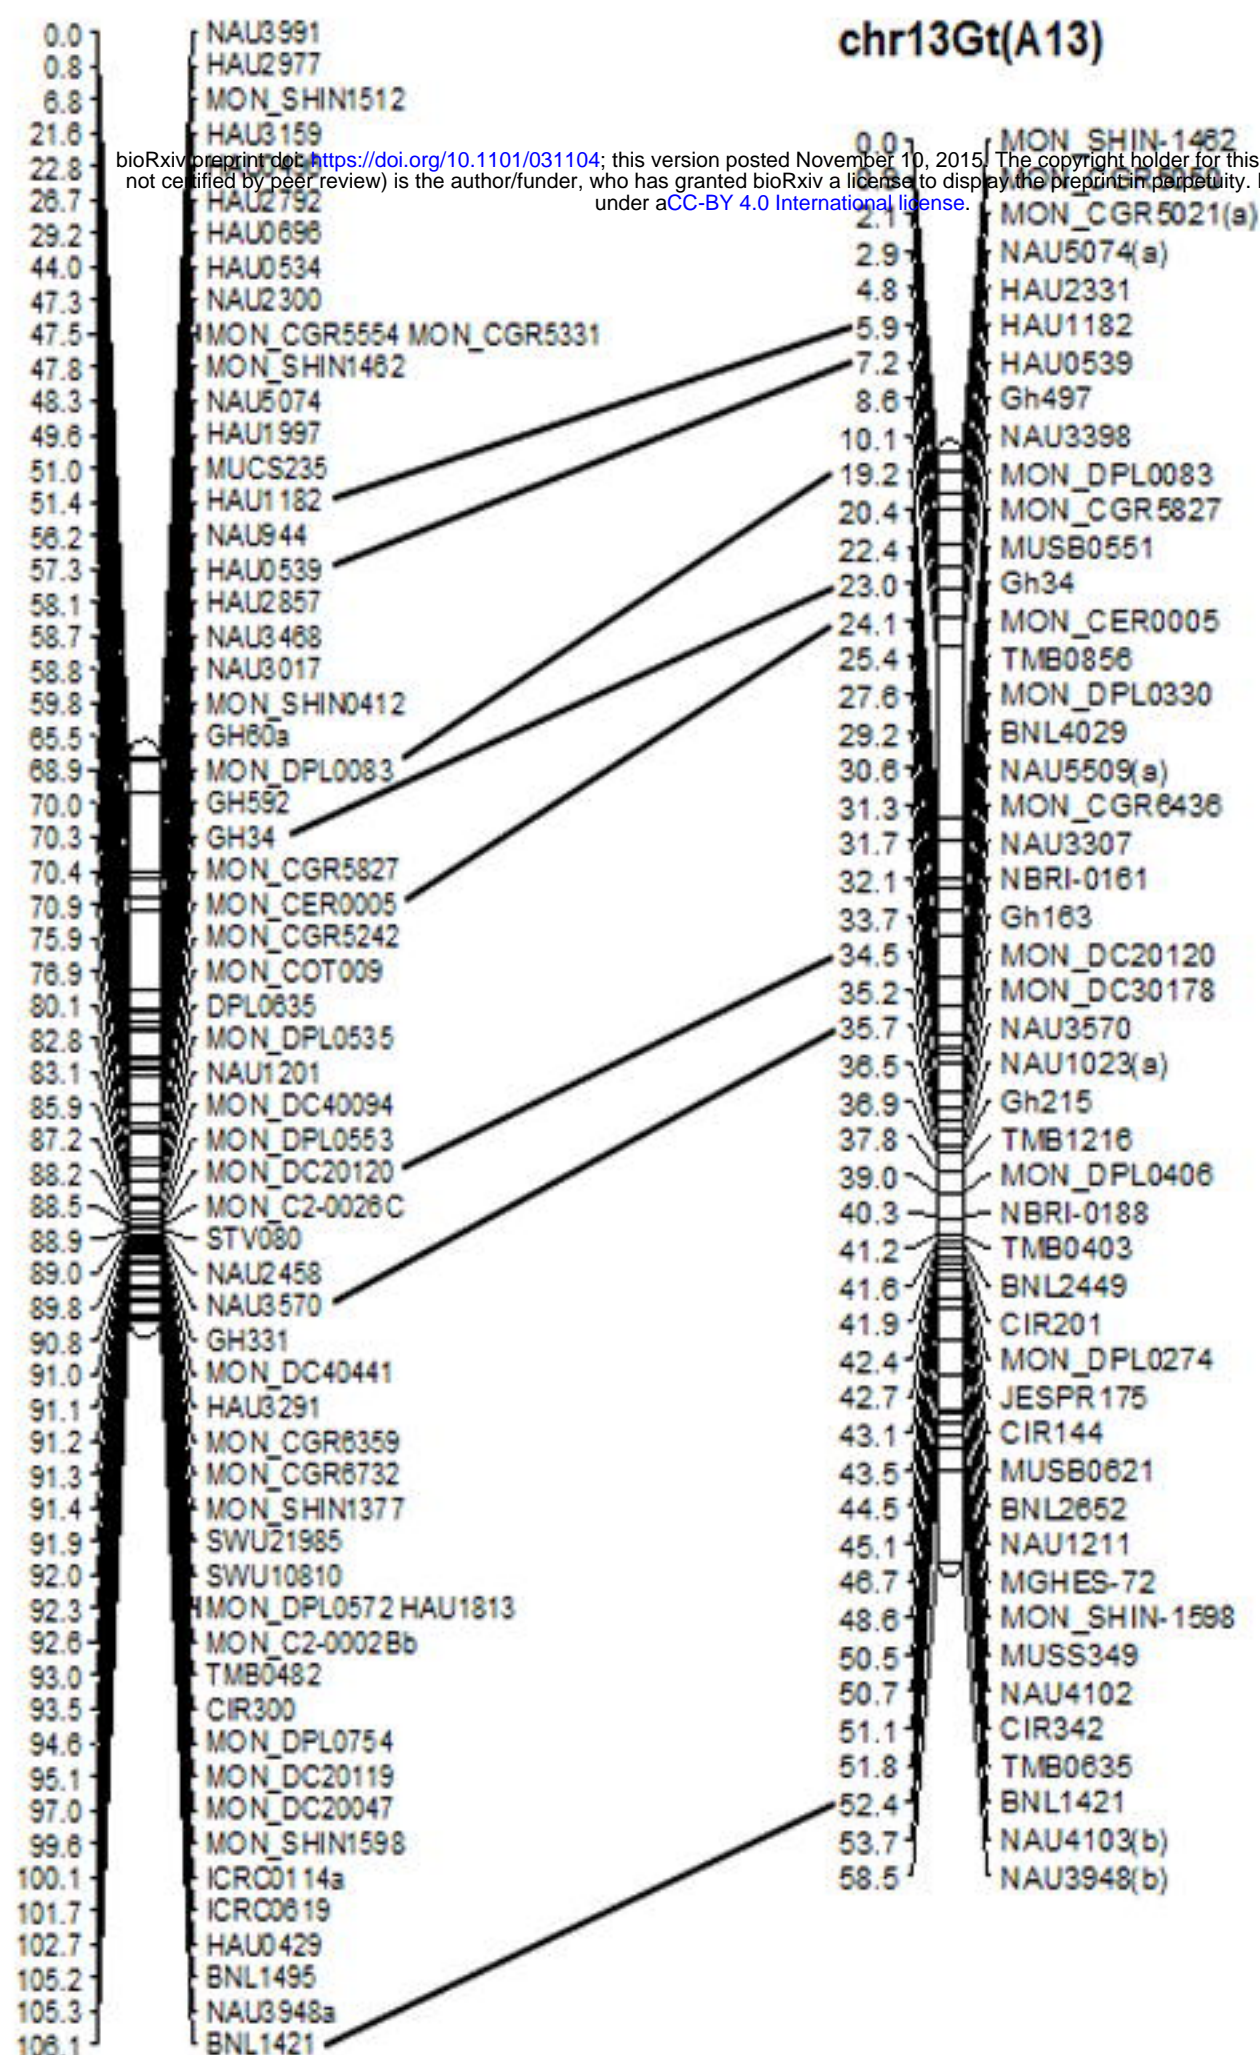

bioRxiv preprint doi: <https://doi.org/10.1101/031104>; this version posted November 10, 2015. The copyright holder for this preprint (which was not certified by peer review) is the author/funder, who has granted bioRxiv a license to display the preprint in perpetuity. It is made available under aCC-BY 4.0 International license.

## chr18Gd(D13)

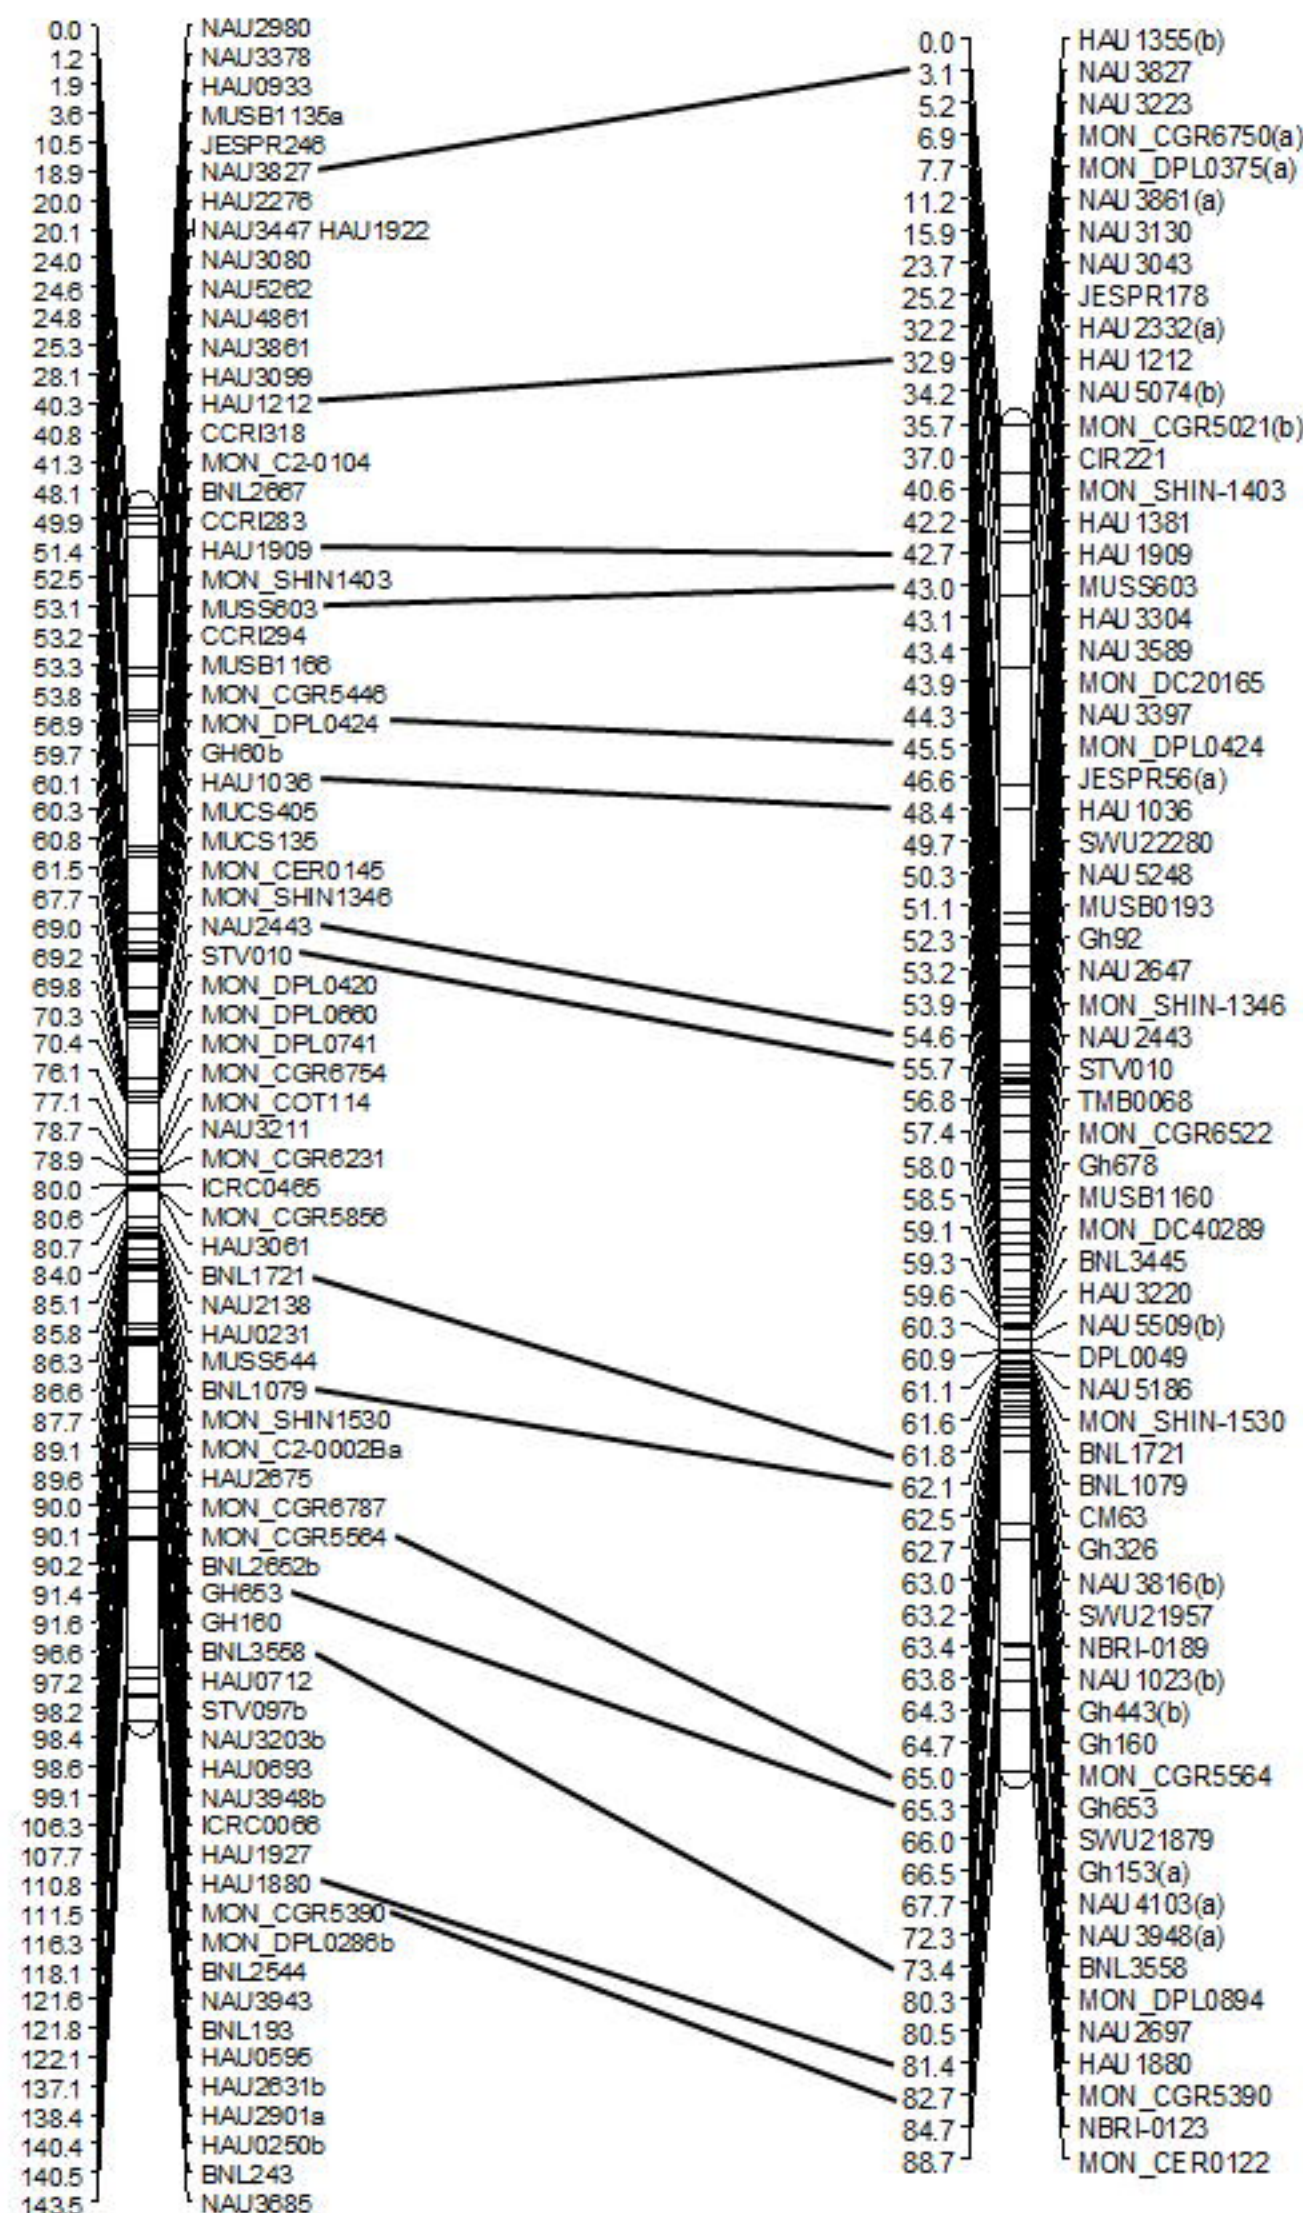

Source: http://biorxiv.org/content/10.1101/031104v1.full.pdf
